# Supplementary material for: Alteration of actin dependent signaling pathways associated with membrane microdomains in hyperlipidemia
Source: Proteome Sci. 2015 Dec 1;13:30. doi: 10.1186/s12953-015-0087-0 (PMC4666118; doi:10.1186/s12953-015-0087-0)
Supplement: Additional file 2: Table S1. — Mass spectrometry data of differentially abundant proteins extracted from Protein Center databases. (XLSX 66 kb) [file 12953_2015_87_MOESM2_ESM.xlsx]

## Sheet: S1_rev2
	Mass spectrometry data of differentially abundant proteins extracted from Protein Center databases
UNIPROT ACCESION	DESCRIPTION	GENE	GENE Official symbol	GENE Entrez synonym	CHROMOSOME	CHROMOSOME MAP	TAXONOMY	TRANSMEMBRANE DOMAIN	SIGNAL PEPTIDE	PFAM DOMAIN	GENE ONTOLOGY SLIM CELLULAR COMPONENT	GENE ONTOLOGY SLIM BIOLOGICAL PROCESS	GENE ONTOLOGY SLIM MOLECULAR FUNCTION	LENGTH IN AMINOACIDS	MONOISOTOPIC MASS (Da)
Q9CPX8	cytochrome b-c1 complex subunit 10	ENSMUSG00000020163,66594	Uqcr11	Uqcr,AL022707,0710008D09Rik	10	10|10 C1	Mus musculus	0	S	PF08997	membrane,mitochondrion	metabolic process,transport	catalytic activity,transporter activity	56	6534.42
Q18PE0	Protein Dok-7	ENSMUSG00000044716,231134	Dok7	A930013K19Rik,Dok-7,Oit5,EF-12,AW049091	5	5|5 B2	Mus musculus	1		PF02174	membrane	cell organization and biogenesis,regulation of biological process	protein binding	504	53143.4
Q922Q4	Pyrroline-5-carboxylate reductase 2	69051,ENSMUSG00000026520	Pycr2	P5cr2,1810018M05Rik	1	1|1 H5	Mus musculus	0	S	PF01210,PF03807,PF10727,PF14748	cytoplasm	metabolic process	catalytic activity,nucleotide binding	320	33637.6
O54931	A-kinase anchor protein 2	ENSMUSG00000038729,11641	Akap2	B230340M18Rik,AA959716,Akap-kl,Prka2,Akap-2,AI649048	4	4|4 B3	Mus musculus	0				cell organization and biogenesis,metabolic process,regulation of biological process,response to stimulus	catalytic activity,protein binding	893	98518.6
P55937	Golgin subfamily A member 3	269682	Golga3	G1-499-14,AW490576,Mea-2,5330413L04,Mea2,repro27,5430416E01Rik,AI449376	5	5 F|5 53.36 cM	Mus musculus	0		PF01576,PF02463,PF04111,PF04156,PF07888,PF09726,PF10186,PF12128,PF13166	Golgi,cytoplasm,cytosol,membrane,nucleus	cell differentiation,development,regulation of biological process	catalytic activity,motor activity,protein binding	1487	167118
P55288	Cadherin-11	ENSMUSG00000031673,12552	Cdh11	Cad11	8	8 D2|8 50.44 cM	Mus musculus	1	S	PF00028,PF01049	cytoplasm,membrane	cell organization and biogenesis	metal ion binding	796	88058
O35744	Chitinase-like protein 3	ENSMUSG00000040809,12655	Chi3l3,Chil3	Chi3l3,Ym1,ECF-L,Chil3,AI505981	3	3 F2.2|3 46.49 cM	Mus musculus	0	S	PF00704	cytoplasm,endoplasmic reticulum,extracellular,nucleus,organelle lumen	defense response,metabolic process,response to stimulus	catalytic activity	398	44430.2
Q2PZL6	Protocadherin Fat 4	329628,ENSMUSG00000046743	Fat4	9430004M15,6030410K14Rik	3	3|3 B	Mus musculus	3	S	PF00008,PF00028,PF00054,PF02210,PF07645,PF07974,PF12662,PF12947,PF14670	membrane	cell differentiation,cell organization and biogenesis,regulation of biological process,response to stimulus	metal ion binding,protein binding	4981	539983
O55098	Serine/threonine-protein kinase 10	20868,ENSMUSG00000020272	Stk10	mKIAA4026,Gek1,Lok	11	11 18.97 cM|11 A4	Mus musculus	0		PF00069,PF02463,PF04111,PF07714,PF12128,PF12474,PF13868,PF13904	cytoplasm,membrane	metabolic process,regulation of biological process,response to stimulus	catalytic activity,nucleotide binding,protein binding,signal transducer activity	966	111836
Q9DBP0	Sodium-dependent phosphate transport protein 2B	ENSMUSG00000029188,20531	Slc34a2	D5Ertd227e,NaPi-2b,AA536683,Npt2b	5	5 C1|5 28.92 cM	Mus musculus	9		PF02690	membrane	cellular homeostasis,response to stimulus,transport	metal ion binding,protein binding,transporter activity	697	76194.6
Q80SY3	V-type proton ATPase subunit d 2	ENSMUSG00000028238,242341	Atp6v0d2	AI324824,1620401A02Rik,V-ATPase	4	4|4 A3	Mus musculus	1		PF01992	endosome,membrane	transport	transporter activity	350	40467.3
Q8K4Q8	Collectin-12	140792,ENSMUSG00000036103	Colec12	CL-P1,SRCL,Scara4	18	18|18 A1	Mus musculus	0	S	PF00059	membrane	regulation of biological process,response to stimulus	metal ion binding,receptor activity,signal transducer activity	742	81253.4
P56959	RNA-binding protein FUS	233908,ENSMUSG00000030795	Fus	Tls,D430004D17Rik,Fus1,D930039C12Rik	7	7|7 F3	Mus musculus	0		PF00076,PF00641,PF13893,PF14259	cytoplasm,nucleus	response to stimulus	DNA binding,RNA binding,metal ion binding,nucleotide binding,protein binding	518	52641.4
Q61792	LIM and SH3 domain protein 1	ENSMUSG00000038366,16796	Lasp1	Tg(Col1a1-lacZ)1Ngma,SH3P6,Def-4,AA408629	11	11 61.1 cM|11 C-D	Mus musculus	0		PF00018,PF00412,PF00880,PF07653,PF14604	cytoplasm,cytoskeleton	transport	metal ion binding,protein binding,transporter activity	263	29975.3
Q64727	Vinculin	ENSMUSG00000021823,22330	Vcl	AW545629,AI462105,9430097D22,AA571387	14	14 A3|14 11.53 cM	Mus musculus	0		PF01044	cytoplasm,cytoskeleton,membrane	cell growth,cell organization and biogenesis,regulation of biological process,transport	catalytic activity,protein binding,structural molecule activity	1066	116644
Q8C166	Copine-1	ENSMUSG00000074643,266692	Cpne1	mKIAA4108,1810028N16Rik	2	2|2 H2	Mus musculus	1		PF00168,PF07002,PF10138	cytoplasm,cytosol,membrane,nucleus	cell growth,metabolic process,regulation of biological process,response to stimulus	catalytic activity,metal ion binding,protein binding	536	58849.5
Q8R2Q8	bone marrow stromal antigen 2	ENSMUSG00000046718,69550	Bst2	DAMP-1,2310015I10Rik,GREG,Bst-2,C87040,CD317	8	8|8 B3.3	Mus musculus	0	S	PF04849,PF14193	Golgi,cell surface,cytoplasm,endosome,membrane	defense response,regulation of biological process,response to stimulus	RNA binding,enzyme regulator activity,protein binding,signal transducer activity	172	19140
P15388	Potassium voltage-gated channel subfamily C member 1	ENSMUSG00000058975,16502	Kcnc1	KV4,KShIIIB,Shaw,C230009H10Rik,Kcr2-1,NGK2,Kv3.1	7	7 B4|7 30.1 cM	Mus musculus	7		PF00520,PF02214,PF07885	cell surface,membrane	cell organization and biogenesis,regulation of biological process,transport	protein binding,transporter activity	511	57891.3
Q91X72	Hemopexin	15458,ENSMUSG00000030895	Hpx	Hpxn,hx	7	7|7 F1	Mus musculus	0	S	PF00045	extracellular	cellular homeostasis,metabolic process,regulation of biological process,transport	metal ion binding,transporter activity	460	51285.2
O08842	GDNF family receptor alpha-2	14586,ENSMUSG00000022103	Gfra2		14	14|14 D3-E1	Mus musculus	0		PF02351	membrane	regulation of biological process,response to stimulus	receptor activity,signal transducer activity	464	51692.9
P52430	Serum paraoxonase/arylesterase 1	18979,ENSMUSG00000002588	Pon1	Pon	6	6 1.99 cM|6 A2	Mus musculus	0		PF01731,PF03088,PF08450	extracellular	metabolic process,regulation of biological process,response to stimulus	catalytic activity,metal ion binding,protein binding	355	39540.3
O55222	Integrin-linked protein kinase	16202,ENSMUSG00000030890	Ilk	AA511515,ESTM24	7	7|7 E1	Mus musculus	0		PF00023,PF00069,PF07714,PF12796,PF13606,PF13637,PF13857	cytoplasm,membrane,nucleus	cell organization and biogenesis,cellular component movement,metabolic process,regulation of biological process,response to stimulus	catalytic activity,nucleotide binding,protein binding,signal transducer activity	452	51340
P08103	Tyrosine-protein kinase HCK	15162	Hck	AI849071,Bmk	2	2 H1|2 75.41 cM	Mus musculus	2		PF00017,PF00018,PF00069,PF07653,PF07714,PF14604	Golgi,cytoplasm,cytoskeleton,cytosol,membrane,nucleus,vacuole	cell differentiation,cell organization and biogenesis,defense response,metabolic process,regulation of biological process,response to stimulus,transport	catalytic activity,nucleotide binding,protein binding	524	59091.7
P70704	Phospholipid-transporting ATPase IA	ENSMUSG00000037685,11980	Atp8a1	ClassI,AW743152,mKIAA4233,B230107D19Rik,AW822227,AI853962,Atp3a2,APLT,AI481521	5	5|5 C3.1	Mus musculus	9		PF00122,PF13246	Golgi,endoplasmic reticulum,membrane	cell organization and biogenesis,metabolic process,regulation of biological process,response to stimulus,transport	catalytic activity,metal ion binding,nucleotide binding,protein binding,transporter activity	1164	131330
P12815	programmed cell death protein 6	18570,ENSMUSG00000021576	Pdcd6	AV299538,Alg2,MA-3,PS2,alg-2	13	13|13 C1	Mus musculus	0		PF00036,PF13405,PF13499,PF13833	cytoplasm,endoplasmic reticulum,endosome,membrane,nucleus	cell death,metabolic process,regulation of biological process,response to stimulus,transport	catalytic activity,metal ion binding,protein binding	191	21853.8
Q9ERB0	Synaptosomal-associated protein 29	ENSMUSG00000022765,67474	Snap29	1300018G05Rik,BB131856,AU020222,AI891940,Gs32	16	16|16 A3	Mus musculus	0		PF05739	Golgi,cytoplasm,membrane,nucleus	cell organization and biogenesis,metabolic process,transport	protein binding	260	29553.9
Q6P069	Sorcin	109552,ENSMUSG00000003161	Sri	2210417O06Rik,2900070H08Rik,Sor	5	5 A1-h|5 3.38 cM	Mus musculus	0		PF13405,PF13499,PF13833	cytoplasm,cytosol,endoplasmic reticulum,membrane,mitochondrion	metabolic process,regulation of biological process,transport	catalytic activity,metal ion binding,protein binding	198	21613.3
P55772	Ectonucleoside triphosphate diphosphohydrolase 1	12495,ENSMUSG00000048120	Entpd1	2610206B08Rik,Cd39,NTPDase-1,AA408691	19	19 C3|19 34.25 cM	Mus musculus	2	S	PF01150	cell surface,membrane	cell organization and biogenesis,metabolic process,regulation of biological process,response to stimulus	catalytic activity,nucleotide binding,protein binding	510	57168.6
P09055	Integrin beta-1	ENSMUSG00000025809,16412	Itgb1	ENSMUSG00000051907,CD29,AA960159,Gm9863,Fnrb,4633401G24Rik,AA409975,gpIIa	8	8|8 E2	Mus musculus	1	S	PF00362,PF07965,PF08725	cell surface,cytoplasm,endosome,membrane	cell communication,cell differentiation,cell growth,cell organization and biogenesis,cellular component movement,cellular homeostasis,development,regulation of biological process,response to stimulus,transport	metal ion binding,protein binding,receptor activity	798	88173.3
Q8CFQ3	Intron-binding protein aquarius	ENSMUSG00000040383,11834	Aqr	mKIAA0560,AW495846	2	2 57.57 cM|2 E5-F2	Mus musculus	3		PF04851,PF13086,PF13087,PF13245,PF13538	membrane,nucleus,spliceosomal complex	metabolic process	DNA binding,RNA binding,catalytic activity,nucleotide binding	1481	170185
Q810U3	Neurofascin	ENSMUSG00000026442,269116	Nfasc	NF,mKIAA0756,AA387016,D430023G06Rik	1	1 E4|1 57.42 cM	Mus musculus	1	S	PF00041,PF00047,PF07679,PF07686,PF13882,PF13895,PF13927	membrane	cell organization and biogenesis,cellular component movement,transport	protein binding	1240	137889
Q8C522	endonuclease domain-containing 1 protein	ENSMUSG00000037419,71946	Endod1	2210414F18Rik,C85344,2310067E08Rik	9	9|9 A3	Mus musculus	6	S	PF01223	extracellular,membrane	metabolic process	catalytic activity,metal ion binding	501	55226.9
Q9JIZ9	Phospholipid scramblase 3	ENSMUSG00000019461,70310	Plscr3	ESTM3,2210403O21Rik,2610037N06Rik,X83310	11	11 B3|11 42.9 cM	Mus musculus	1		PF03803	membrane,mitochondrion	cell death,cell organization and biogenesis,response to stimulus,transport	protein binding,transporter activity	296	31782
P06728	Apolipoprotein A-IV	11808,ENSMUSG00000032080	Apoa4	Apoa-4	9	9 A5.2|9 25.36 cM	Mus musculus	0	S	PF01442,PF07902	cell surface,cytosol,extracellular	cell organization and biogenesis,defense response,metabolic process,regulation of biological process,response to stimulus,transport	antioxidant activity,catalytic activity,enzyme regulator activity,metal ion binding,protein binding,transporter activity	395	45001.1
P70404	Isocitrate dehydrogenase [NAD] subunit gamma 1, mitochondrial	15929,ENSMUSG00000002010	Idh3g		X	X 37.41 cM|X A7.3-B	Mus musculus	0		PF00180	mitochondrion,nucleus	metabolic process,regulation of biological process	catalytic activity,metal ion binding,nucleotide binding	393	42758.2
P26041	Moesin	ENSMUSG00000031207,17698	Msn	C78546	X	X|X C3	Mus musculus	0		PF00373,PF00769,PF09379,PF09380	cell surface,cytoplasm,cytoskeleton,membrane,nucleus	cellular component movement,regulation of biological process	RNA binding,protein binding	577	67725
Q8BH64	EH domain-containing protein 2	259300,ENSMUSG00000074364	Ehd2	C130052H20Rik,BC027084	7	7 A2|7 8.65 cM	Mus musculus	1		PF00350,PF01926,PF12763	endosome,membrane	cell organization and biogenesis,metabolic process,regulation of biological process,transport	catalytic activity,metal ion binding,nucleotide binding,protein binding	543	61135.9
P12367	cAMP-dependent protein kinase type II-alpha regulatory subunit	19087	Prkar2a	AI317181,AI836829,RII(alpha),1110061A24Rik	9	9|9 F2	Mus musculus	0		PF00027,PF02197,PF05758	cytoplasm,membrane	cell organization and biogenesis,metabolic process,regulation of biological process,response to stimulus	catalytic activity,enzyme regulator activity,nucleotide binding,protein binding	401	45360.6
Q9JI91	Alpha-actinin-2	11472,ENSMUSG00000052374	Actn2	1110008F24Rik	13	13 A1|13 4.54 cM	Mus musculus	1		PF00307,PF00435,PF08726,PF11971,PF13499,PF13833	cytoplasm,cytoskeleton	cell organization and biogenesis,regulation of biological process	metal ion binding,protein binding	894	103768
P54071	Isocitrate dehydrogenase [NADP], mitochondrial	269951,ENSMUSG00000030541	Idh2	E430004F23,IDPm,Idh-2	7	7 D3|7 45.43 cM	Mus musculus	0		PF00180	membrane,mitochondrion	metabolic process,response to stimulus	catalytic activity,metal ion binding,nucleotide binding	452	50874
P68373	Tubulin alpha-1C chain	ENSMUSG00000043091,22146	Tuba1c	M[a]6,Tuba6	15	15|15 F1	Mus musculus	0		PF00091,PF03953	cytoplasm,cytoskeleton,nucleus	cell organization and biogenesis,cellular component movement,metabolic process	catalytic activity,nucleotide binding,structural molecule activity	449	49877.5
P08074	Carbonyl reductase [NADPH] 2	12409,ENSMUSG00000025150	Cbr2	MLCR	11	11 E2|11 84.47 cM	Mus musculus	1		PF00106,PF01073,PF01370,PF01488,PF04321,PF05368,PF05724,PF08659,PF13460,PF13561	mitochondrion,organelle lumen	cell organization and biogenesis,metabolic process	catalytic activity,nucleotide binding,protein binding	244	25941.6
P39655	Arachidonate 12-lipoxygenase, 12S-type	11684,ENSMUSG00000000320	Alox12	P-12LO,Alox12p,9930022G08Rik	11	11 B3|11 42.99 cM	Mus musculus	3		PF00305,PF01477	cytoplasm,cytosol,membrane	cellular component movement,metabolic process,regulation of biological process,response to stimulus	catalytic activity,metal ion binding,protein binding	663	75341.5
Q80TF6	StAR-related lipid transfer protein 9	ENSMUSG00000033705,668880	Stard9	mKIAA1300,4831403C07Rik,E230025N21Rik,Kif16a	2	2|2 E5	Mus musculus	1		PF00225,PF00498	Golgi,cytoplasm,cytoskeleton,nucleus	cell organization and biogenesis,cellular component movement,metabolic process	catalytic activity,motor activity,nucleotide binding,protein binding	4561	499933
Q6PDQ2	Chromodomain-helicase-DNA-binding protein 4	107932,ENSMUSG00000063870	Chd4	Mi-2beta,mKIAA4075,AA617397,BC005710,9530019N15Rik,D6Ertd380e	6	6 F3|6 59.28 cM	Mus musculus	2		PF00176,PF00271,PF00385,PF00628,PF04851,PF06461,PF06465,PF08073,PF08074,PF13831	cytoplasm,cytoskeleton,membrane,nucleus	cell organization and biogenesis,metabolic process,regulation of biological process	DNA binding,catalytic activity,metal ion binding,nucleotide binding,protein binding	1915	217613
Q0P557	mitochondria-eating protein	73472,ENSMUSG00000029155	Spata18	1700067I02Rik	5	5|5 C3.3	Mus musculus	2			cytoplasm,membrane,mitochondrion	cell differentiation,development,metabolic process,response to stimulus		537	60360.2
P10649	Glutathione S-transferase Mu 1	ENSMUSG00000058135,14862	Gstm1	Gstb-1,Gstb1	3	3|3 F2.3	Mus musculus	0		PF00043,PF02798,PF13417,PF14497	cytoplasm,extracellular	metabolic process,response to stimulus	catalytic activity,metal ion binding,protein binding	218	25953.1
O54834	Rho GTPase-activating protein 6	11856,ENSMUSG00000031355	Arhgap6	RhoGAPX-1,C130038E13,AI504284	X	X|X F5	Mus musculus	0		PF00620	cytoplasm,cytoskeleton	cell organization and biogenesis,regulation of biological process,response to stimulus	enzyme regulator activity,protein binding	987	108777
Q99JY3	GTPase IMAP family member 4	ENSMUSG00000054435,107526	Gimap4	AU019574,Ian-1,Imap4,E430007K16Rik,Ian1	6	6|6 B2.3	Mus musculus	0		PF01926,PF04548	cytoplasm,cytosol,nucleus		nucleotide binding	219	24538.5
Q61878	Bone marrow proteoglycan	ENSMUSG00000027073,19074	Prg2	mMBP,mMBP-1,MBP	2	2 D|2 49.45 cM	Mus musculus	0	S	PF00059	extracellular	defense response,regulation of biological process,response to stimulus		223	24239.6
O55071	Cytochrome P450 2B19	13090,ENSMUSG00000066704	Cyp2b19	CYPIIB19	7	7 A3|7 15.44 cM	Mus musculus	4	S	PF00067	cytoplasm,endoplasmic reticulum,membrane	metabolic process	catalytic activity,metal ion binding	492	55961.1
P04441	H-2 class II histocompatibility antigen gamma chain	16149,ENSMUSG00000024610	Cd74	HLADG,DHLAG,Ii,Ia-GAMMA,CLIP	18	18 E1|18 34.41 cM	Mus musculus	0	S	PF00086,PF08831,PF09307	Golgi,cell surface,endoplasmic reticulum,endosome,membrane,vacuole	cell organization and biogenesis,cell proliferation,defense response,metabolic process,regulation of biological process,response to stimulus,transport	protein binding,receptor activity,signal transducer activity	279	31536.8
P16110	Galectin-3	16854	Lgals3	L-34,Mac-2,GBP,gal3	14	14|14 C1	Mus musculus	0		PF00337	cell surface,cytoplasm,extracellular,membrane,nucleus,spliceosomal complex	cell differentiation,cell organization and biogenesis,cellular component movement,defense response,metabolic process,regulation of biological process,response to stimulus	RNA binding,protein binding,receptor activity,signal transducer activity	264	27497.5
Q8BHI4	Kelch repeat and BTB domain-containing protein 3	ENSMUSG00000025893,69149	Kbtbd3	Bklhd3,2200003A07Rik	9	9|9 A1	Mus musculus	0		PF00651,PF01344,PF07646,PF07707,PF13418,PF13964			protein binding	607	69506
Q8JZM7	Parafibromin	ENSMUSG00000026361,214498	Cdc73	BC027756,C130030P16Rik,C81219,8430414L16Rik,Hrpt2	1	1 F|1 62.52 cM	Mus musculus	0		PF05179	nucleus	cell organization and biogenesis,metabolic process,regulation of biological process,response to stimulus	protein binding	531	60539.2
Q9CR51	V-type proton ATPase subunit G 1	ENSMUSG00000039105,66290	Atp6v1g1	Atp6g1,ATP6J,Vma10,1810024D14Rik,VAG1,AA960677	4	4|4 C1	Mus musculus	0		PF03179	cytosol,membrane	metabolic process,transport	catalytic activity,protein binding,transporter activity	118	13716
P26040	Ezrin	22350,ENSMUSG00000052397	Ezr	R75297,p81,Vil2,AW146364	17	17|17 A1	Mus musculus	0		PF00373,PF00769,PF09379,PF09380	cytoplasm,cytoskeleton,cytosol,endosome,membrane	cell differentiation,cell organization and biogenesis,metabolic process,regulation of biological process,response to stimulus,transport	RNA binding,protein binding	586	69363.7
P43024	Cytochrome c oxidase subunit 6A1, mitochondrial	12861	Cox6a1	VIaL	5	5 F|5 56.06 cM	Mus musculus	1		PF02046	membrane,mitochondrion	metabolic process,transport	catalytic activity,transporter activity	111	12344.3
P01942	Hemoglobin subunit alpha	15122110257	Hba-a1,Hba-a2	Hba1,Hba,Hbat1	11	11 A4|11 18.86 cM,11|11 18.87 cM	Mus musculus	0		PF00042	membrane	response to stimulus,transport	antioxidant activity,catalytic activity,metal ion binding,protein binding,transporter activity	142	15075.8
Q8BJU2	tetraspanin-9	109246,ENSMUSG00000030352	Tspan9	9430079M16Rik,AU018597,6720474K14Rik	6	6|6 F3	Mus musculus	3	S	PF00335	membrane			239	26719.5
Q3ULF4	Paraplegin	234847,ENSMUSG00000000738	Spg7	Cmar,PGN,AU015315,AI452278	8	8|8 E1	Mus musculus	2		PF00004,PF01078,PF01434,PF05496,PF06068,PF07724,PF07728	membrane,mitochondrion	cell organization and biogenesis,cellular component movement,metabolic process,regulation of biological process,response to stimulus,transport	catalytic activity,metal ion binding,nucleotide binding	781	85942
Q8R480	nuclear pore complex protein Nup85	445007,ENSMUSG00000020739	Nup85	frount,Pcnt1	11	11|11 E2	Mus musculus	1		PF07575	chromosome,cytoplasm,cytoskeleton,membrane,nucleus	cell organization and biogenesis,cellular component movement,regulation of biological process,response to stimulus,transport	protein binding	656	74727.9
Q9CWU2	Palmitoyltransferase ZDHHC13	ENSMUSG00000030471,243983	Zdhhc13	C530010M18,skc4,HIP3RP,kojak,Hip14l,2410004E01Rik	7	7|7 B4	Mus musculus	6		PF00023,PF01529,PF12796,PF13606,PF13637,PF13857	Golgi,endoplasmic reticulum,membrane	metabolic process,regulation of biological process,response to stimulus,transport	catalytic activity,metal ion binding,protein binding,signal transducer activity,transporter activity	622	70843.4
P15306	Thrombomodulin	21824,ENSMUSG00000074743	Thbd	CD141,TM,AI385582	2	2 G3|2 73.45 cM	Mus musculus	1	S	PF00059,PF06247,PF07645,PF09064,PF12662,PF14670	cell surface,membrane	coagulation,regulation of biological process,response to stimulus	metal ion binding,protein binding,receptor activity,signal transducer activity	577	61826.6
Q9JJW5	myozenin-2	ENSMUSG00000028116,59006	Myoz2	Myozl2,Fatz-2,1110012I24Rik	3	3|3 G3	Mus musculus	0		PF05556	cytoplasm,cytoskeleton		protein binding	264	29743
Q9CUU3	Synaptonemal complex protein 2	320558,ENSMUSG00000060445	Sycp2	3830402K23Rik,4930518F03Rik	2	2|2 H4	Mus musculus	0			chromosome,nucleus	cell death,cell division,cell organization and biogenesis,regulation of biological process	DNA binding,protein binding	1500	172014
P48036	annexin A5	11747,ENSMUSG00000027712	Anxa5	R74653,Anx5	3	3 B|3 17.46 cM	Mus musculus	0		PF00191	cytoplasm,membrane,nucleus	cell organization and biogenesis,coagulation,regulation of biological process,response to stimulus	metal ion binding,protein binding	319	35730.2
P40936	Indolethylamine N-methyltransferase	ENSMUSG00000003477,21743	Inmt	Temt	6	6|6 B3	Mus musculus	1		PF01234	cytoplasm,cytosol	metabolic process,response to stimulus	catalytic activity	264	29440.8
Q9DCN2	NADH-cytochrome b5 reductase 3	ENSMUSG00000018042,109754	Cyb5r3	C85115,WU:AL591952.1-001,2500002N19Rik,0610016L08Rik,WU:Cyb5r3,WU:AL591952.1-002,WU:AL591952.1-003,Dia1,Dia-1	15	15 E|15 39.4 cM	Mus musculus	1		PF00175,PF00970	cytoplasm,cytosol,endoplasmic reticulum,membrane,mitochondrion	metabolic process	catalytic activity,nucleotide binding,protein binding	301	34105.8
P63001	Ras-related C3 botulinum toxin substrate 1	19353,ENSMUSG00000001847	Rac1	AL023026,D5Ertd559e	5	5 G2|5 82.22 cM	Mus musculus	1		PF00025,PF00071,PF08477	cytoplasm,cytosol,membrane,nucleus	cell communication,cell differentiation,cell organization and biogenesis,cell proliferation,cellular component movement,metabolic process,regulation of biological process,response to stimulus,transport	catalytic activity,nucleotide binding,protein binding	192	21436.2
Q9QXD8	LIM domain-containing protein 1	ENSMUSG00000025239,29806	Limd1	D9Ertd192e,AW822033	9	9 74.0 cM|9 F	Mus musculus	0		PF00412	cytoplasm,nucleus	cell organization and biogenesis,cellular component movement,metabolic process,regulation of biological process,response to stimulus	metal ion binding,protein binding	668	71376
Q8K2I9	F-box only protein 18	50755,ENSMUSG00000058594	Fbxo18	Fbh1,Fbx18,AU015756	2	2|2 A1	Mus musculus	1		PF00580,PF00646,PF12937,PF13086,PF13361,PF13538	nucleus	metabolic process,regulation of biological process,response to stimulus	DNA binding,catalytic activity,nucleotide binding,protein binding	1042	118223
P63260	Actin, cytoplasmic 2	ENSMUSG00000062825,11465	Actg1	AL023024,Actg,Actl,E51	11	11|11 E2	Mus musculus	0		PF00022	cytoplasm,cytoskeleton,cytosol,membrane,nucleus	cell organization and biogenesis	nucleotide binding,protein binding,structural molecule activity	375	41765.8
Q8K4G5	Actin-binding LIM protein 1	226251	Ablim1	AW060987,abLIM-M,abLIM-L,9330196J19Rik,2610209L21Rik,4833406P10Rik,mKIAA0059,AV079770,2210411C18Rik,abLIM-S,AW215784,Limab1	19	19 D2|19 52.09 cM	Mus musculus	0		PF00412,PF02209	cytoplasm,cytoskeleton	cell organization and biogenesis,cellular component movement,regulation of biological process	metal ion binding,protein binding	861	96742.9
Q9CRC0	vitamin K epoxide reductase complex subunit 1	27973,ENSMUSG00000096145	Vkorc1	D7Wsu86e	7	7 F3|7 69.81 cM	Mus musculus	1	S	PF07884	endoplasmic reticulum,membrane	coagulation,metabolic process,regulation of biological process,response to stimulus	catalytic activity	161	17756.4
Q9JLF6	Protein-glutamine gamma-glutamyltransferase K	21816	Tgm1	2310004J08Rik,Tgase1	14	14|14 C1	Mus musculus	0		PF00868,PF00927,PF01841	membrane	cell differentiation,metabolic process	catalytic activity,metal ion binding	815	89769.5
Q64462	Cytochrome P450 4B1	ENSMUSG00000028713,13120	Cyp4b1		4	4 D1|4 53.06 cM	Mus musculus	1		PF00067	endoplasmic reticulum,membrane	metabolic process	catalytic activity,metal ion binding	511	58862.2
Q9WTR1	Transient receptor potential cation channel subfamily V member 2	22368,ENSMUSG00000018507	Trpv2	VRL-1,Vrl1,OTRPC2,GRC	11	11|11 B2	Mus musculus	6		PF00023,PF12796,PF13606,PF13637,PF13857	cell surface,cytoplasm,membrane	cell death,regulation of biological process,response to stimulus,transport	protein binding,transporter activity	756	85910.6
O88792	Junctional adhesion molecule A	16456,ENSMUSG00000038235	F11r	Jcam,JAM-1,Jcam1,JAM,AA638916,JAM-A,Ly106,9130004G24,ESTM33	1	1 H2|1 79.43 cM	Mus musculus	1	S	PF00047,PF07679,PF07686,PF13895,PF13927	cytoskeleton,membrane	cell differentiation,cell organization and biogenesis,regulation of biological process,transport	protein binding	300	32403.1
Q7TPR4	Alpha-actinin-1	109711,ENSMUSG00000015143	Actn1	3110023F10Rik,Actn1a	12	12 C3|12 36.49 cM	Mus musculus	1		PF00036,PF00307,PF00435,PF08726,PF11971,PF13405,PF13499	cytoplasm,cytoskeleton,membrane,nucleus	cell organization and biogenesis,regulation of biological process	RNA binding,metal ion binding,protein binding	892	103004
Q02496	mucin-1	17829	Muc1	EMA,Muc-1,CD227	3	3 F1|3 39.02 cM	Mus musculus	3	S	PF01390	cell surface,cytoplasm,membrane,nucleus	cell differentiation,regulation of biological process,response to stimulus	DNA binding,protein binding	630	64500.3
P51432	1-phosphatidylinositol 4,5-bisphosphate phosphodiesterase beta-3	ENSMUSG00000024960,18797	Plcb3	mKIAA4098	19	19 5.1 cM|19 B	Mus musculus	0		PF00168,PF00387,PF00388,PF08703,PF09279	cytosol,membrane,nucleus	cell communication,metabolic process,regulation of biological process,response to stimulus,transport	catalytic activity,metal ion binding,protein binding,signal transducer activity	1234	139400
Q8BFY6	Peflin	67898,ENSMUSG00000028779	Pef1	2600002E23Rik,Peflin	4	4|4 D3	Mus musculus	0		PF00036,PF13202,PF13405,PF13499,PF13833	cytoplasm,membrane	metabolic process,response to stimulus	RNA binding,catalytic activity,metal ion binding,protein binding	275	29209
P13597	Intercellular adhesion molecule 1	ENSMUSG00000037405,15894	Icam1	Icam-1,MALA-2,CD54,Ly-47	9	9 A3|9 7.69 cM	Mus musculus	1	S	PF03921,PF07679,PF13895	cell surface,membrane	cell communication,cell organization and biogenesis,cellular component movement,cellular homeostasis,defense response,regulation of biological process,response to stimulus	protein binding	537	58807.3
P35459	Lymphocyte antigen 6D	17068,ENSMUSG00000034634	Ly6d	Ly-61,Thb,Ly61	15	15 D3|15 34.27 cM	Mus musculus	0	S	PF00021	cell surface,membrane	cell differentiation,response to stimulus		127	13386.6
F6SEU4	Ras/Rap GTPase-activating protein SynGAP	240057,ENSMUSG00000067629	Syngap1	Syngap,Gm1963	17	17|17 A3.3	Mus musculus	1		PF00168,PF00169,PF00616,PF02463,PF04156,PF09744,PF12004,PF12037	cytoplasm,membrane	cell organization and biogenesis,regulation of biological process,response to stimulus	enzyme regulator activity,protein binding	1340	148145
Q61879	Myosin-10	77579,ENSMUSG00000020900	Myh10	NMHC II-B,NMHCII-B,Myhn-2,mKIAA3005,NMMHC-B,NMHC-B,Myhn2,Fltn,NMMHC-IIB,5730504C04Rik,NMMHC II-b,9330167F11Rik,SMemb	11	11 B3|11 41.95 cM	Mus musculus	2		PF00063,PF00769,PF01496,PF01576,PF02736,PF02841,PF04111,PF05622,PF05667,PF05911,PF06637,PF07888,PF09726,PF09731,PF12128,PF13094,PF13514	cytoplasm,cytoskeleton,cytosol,membrane,mitochondrion,nucleus	cell organization and biogenesis,cell proliferation,cellular component movement,metabolic process,regulation of biological process,transport	catalytic activity,motor activity,nucleotide binding,protein binding,transporter activity	1976	228854
Q9EPR5	VPS10 domain-containing receptor SorCS2	81840,ENSMUSG00000029093	Sorcs2	N28137,mKIAA1329	5	5|5 B3	Mus musculus	1	S	PF00801	membrane	transport	protein binding	1159	128822
Q64339	Ubiquitin-like protein ISG15	100038882,ENSMUSG00000035692	Isg15	UCRP,G1p2,IP17,IGI15,Irfp	4	4 E2|4	Mus musculus	0		PF00240,PF11976	cytoplasm,extracellular	defense response,metabolic process,regulation of biological process,response to stimulus	protein binding	161	17886.3
Q9R069	Basal cell adhesion molecule	57278,ENSMUSG00000002980	Bcam	Lu,B-CAM,1200005K12Rik,Gplu	7	7|7 A3	Mus musculus	1	S	PF00047,PF07679,PF08205,PF13895,PF13927	cell surface,membrane		protein binding,receptor activity	622	67627.7
P56392	Cytochrome c oxidase subunit 7A1, mitochondrial	ENSMUSG00000074218,12865	Cox7a1	COX7A,COX7AM,COX7AH	7	7 B1|7 17.31 cM	Mus musculus	0		PF02238	membrane,mitochondrion	metabolic process,transport	catalytic activity,transporter activity	80	8980.62
Q9CX86	Heterogeneous nuclear ribonucleoprotein A0	ENSMUSG00000007836,77134	Hnrnpa0	Hnrpa0,1110055B05Rik,3010025E17Rik,hnRNP A0	13	13|13 B1	Mus musculus	0		PF00076,PF13893,PF14259	nucleus	defense response,regulation of biological process,response to stimulus	RNA binding,nucleotide binding,protein binding	305	30511.7
Q9QYE6	Golgin subfamily A member 5	27277,ENSMUSG00000021192	Golga5	Ret-II	12	12|12 F1	Mus musculus	1		PF00769,PF01496,PF01576,PF02463,PF03148,PF03961,PF04111,PF04156,PF04799,PF05557,PF05622,PF05701,PF06160,PF07111,PF07888,PF08317,PF08393,PF09726,PF09787,PF10174,PF10186,PF10234,PF10473,PF11559,PF12128,PF12252,PF13166,PF13514,PF15070	Golgi,cytoplasm,cytoskeleton,membrane,nucleus	cell differentiation,cell organization and biogenesis,metabolic process,regulation of biological process,transport	catalytic activity,motor activity,protein binding	729	82317.7
A2A891	Calmodulin-binding transcription activator 1	100072,ENSMUSG00000014592	Camta1	mKIAA0833,2310058O09Rik,AW987475,AI316882,1810059M14Rik	4	4|4 E2	Mus musculus	0		PF01833,PF03859,PF12796,PF13637,PF13857	cytoplasm,nucleus	metabolic process,regulation of biological process	DNA binding,protein binding	1682	184201
Q9JHU2	palmdelphin	114301	Palmd	PALML,4631423C22Rik	3	3 G1|3 50.49 cM	Mus musculus	0		PF03285,PF13851	cytoplasm,membrane	regulation of biological process	protein binding	551	62661.6
P35242	Pulmonary surfactant-associated protein A	20387	Sftpa1	SP-A,Sftp-1,Sftp1	14	14 B|14 22.36 cM	Mus musculus	0	S	PF00059	endoplasmic reticulum,endosome,extracellular	regulation of biological process	metal ion binding,protein binding	248	26140.7
Q61838	alpha-2-macroglobulin	ENSMUSG00000030359,11287	Pzp	A2m,A1m,AI893533,MAM	6	6 63.02 cM|6 F1-G3	Mus musculus	1	S	PF00207,PF01835,PF07677,PF07678,PF07703,PF10569,PF11974,PF13249	extracellular	regulation of biological process	enzyme regulator activity,protein binding	1495	165747
Q7TPW1	Nexilin	68810,ENSMUSG00000039103	Nexn	1110046H09Rik,AA553326,NELIN	3	3|3 H3	Mus musculus	0		PF00047,PF07679,PF13895	cytoplasm,cytoskeleton	metabolic process,regulation of biological process	catalytic activity,protein binding,structural molecule activity	607	72063.8
Q61462	Cytochrome b-245 light chain	ENSMUSG00000006519,13057	Cyba	b558,p22-phox,nmf333,p22phox	8	8|8 E1	Mus musculus	2	S	PF05038	Golgi,cytoplasm,endosome,membrane,mitochondrion	cell organization and biogenesis,cellular homeostasis,defense response,metabolic process,regulation of biological process,response to stimulus,transport	catalytic activity,metal ion binding,protein binding	192	20735
Q80TJ7	Histone lysine demethylase PHF8	ENSMUSG00000041229,320595	Phf8	9830141C09Rik,mKIAA1111	X	X|X F3	Mus musculus	0		PF00628,PF02373,PF13621	cytoskeleton,membrane,nucleus	cell organization and biogenesis,metabolic process,regulation of biological process	catalytic activity,metal ion binding,protein binding	1023	113482
Q91VC4	Plasmalemma vesicle-associated protein	84094	Plvap	Pv1,MECA32	8	8 B3.3|8 34.43 cM	Mus musculus	0	S	PF06637	cell surface,cytoplasm,membrane	metabolic process,regulation of biological process,response to stimulus	protein binding	438	49902.2
Q60634	Flotillin-2	14252,ENSMUSG00000061981	Flot2	Esa,reggie-2,AI573412	11	11 B5|11 46.74 cM	Mus musculus	0		PF01145	cell surface,cytoskeleton,endosome,membrane	cell organization and biogenesis,regulation of biological process	protein binding	428	47008.7
Q80VQ0	Aldehyde dehydrogenase family 3 member B1	67689,ENSMUSG00000024885	Aldh3b1	ALDH7,1700001N19Rik,ALDH4	19	19|19 A	Mus musculus	2		PF00171	cytoplasm,cytosol,membrane	metabolic process,response to stimulus	catalytic activity	468	52258.8
Q61739	integrin alpha-6	16403,ENSMUSG00000027111	Itga6	AI115430,5033401O05Rik,Cd49f,VLA-6	2	2 C2-C3|2 42.79 cM	Mus musculus	2	S	PF01839,PF08441,PF13517,PF14312	cell surface,membrane	cell communication,cell differentiation,cell organization and biogenesis,cellular component movement,regulation of biological process,response to stimulus	metal ion binding,protein binding	1091	122082
Q4PZA2	Endothelin-converting enzyme 1	230857	Ece1	ECE-1b,ECE-1a,ECE-1d,ECE-1,AW322500	4	4|4 D3	Mus musculus	3	S	PF01431,PF05649	Golgi,cell surface,endosome,membrane	cell death,metabolic process,regulation of biological process,response to stimulus	catalytic activity,metal ion binding,protein binding	769	87017.1
Q9QY30	Bile salt export pump	27413,ENSMUSG00000027048	Abcb11	PFIC2,PGY4,SPGP,ABC16,Lith1,Bsep	2	2 C2|2 39.69 cM	Mus musculus	9		PF00005,PF00664	Golgi,membrane	metabolic process,response to stimulus,transport	catalytic activity,nucleotide binding,transporter activity	1321	146655
P68181	cAMP-dependent protein kinase catalytic subunit beta	18749,ENSMUSG00000005034	Prkacb	Pkacb	3	3|3 H3	Mus musculus	1		PF00069,PF07714,PF14531	cytoplasm,cytosol,membrane,nucleus	metabolic process,regulation of biological process,response to stimulus	catalytic activity,metal ion binding,nucleotide binding,protein binding	351	40682
P50285	Dimethylaniline monooxygenase [N-oxide-forming] 1	14261,ENSMUSG00000040181	Fmo1		1	1 70.34 cM|1 H1	Mus musculus	2		PF00743,PF07992,PF13434,PF13450,PF13454,PF13738	endoplasmic reticulum,membrane	metabolic process,response to stimulus	catalytic activity,nucleotide binding	532	59876.1
Q9JKY5	Huntingtin-interacting protein 1-related protein	ENSMUSG00000000915,29816	Hip1r	mKIAA0655,AA410023	5	5|5 F	Mus musculus	0		PF01417,PF01576,PF01608,PF04111,PF05262,PF06160,PF07651,PF07888,PF10186,PF12128	cytoplasm,cytoskeleton,membrane	cell death,cell organization and biogenesis,regulation of biological process,transport	catalytic activity,motor activity,protein binding	1068	119353
Q9D6R2	Isocitrate dehydrogenase [NAD] subunit alpha, mitochondrial	67834,ENSMUSG00000032279	Idh3a	AA407078,1500012E04Rik,1110003P10Rik,AI316514	9	9|9 A5.3	Mus musculus	2		PF00180	mitochondrion,nucleus	metabolic process	catalytic activity,metal ion binding,nucleotide binding	366	39613.1
Q3TTE0	Disintegrin and metalloproteinase domain-containing protein 5	11499,ENSMUSG00000031554	Adam5	tMDC II,tMDCII	8	8 A2|8 13.26 cM	Mus musculus	3	S	PF00200,PF01421,PF01562,PF08516	membrane	metabolic process,regulation of biological process,response to stimulus	catalytic activity,metal ion binding,protein binding	751	84478.9
Q9Z0X1	Apoptosis-inducing factor 1, mitochondrial	26926,ENSMUSG00000036932	Aifm1	Pdcd8,mAIF,AIFsh2,Hq,AIF	X	X 25.68 cM|X A6	Mus musculus	2		PF00070,PF07992,PF14721,PF14962	cytoplasm,cytosol,membrane,mitochondrion,nucleus	cell death,cell differentiation,cell organization and biogenesis,cellular homeostasis,metabolic process,regulation of biological process,response to stimulus	DNA binding,catalytic activity,nucleotide binding,protein binding	612	66724
Q8C0M8	Dynein intermediate chain 1, axonemal	ENSMUSG00000061322,68922	Dnaic1	1110066F04Rik,BB124644,Dnai1,b2b1526Clo	4	4|4 A5	Mus musculus	0		PF00400,PF13829	cytoplasm,cytoskeleton	cell organization and biogenesis,cellular component movement,metabolic process	catalytic activity,motor activity,protein binding	701	79707.7
Q04736	tyrosine-protein kinase Yes	22612,ENSMUSG00000014932	Yes1	p61-Yes,Yes	5	5 B1|5 17.33 cM	Mus musculus	0		PF00017,PF00018,PF00069,PF07653,PF07714,PF14604	Golgi,cytoplasm,cytoskeleton,cytosol,membrane	cell differentiation,defense response,metabolic process,regulation of biological process,response to stimulus,transport	catalytic activity,nucleotide binding,protein binding	541	60591.6
Q61545	RNA-binding protein EWS	14030,ENSMUSG00000009079	Ewsr1	Ews,Ewsh,AU018891	11	11|11 A1-A3	Mus musculus	0		PF00076,PF00641,PF14259	cytoplasm,membrane,nucleus	metabolic process,regulation of biological process	RNA binding,metal ion binding,nucleotide binding,protein binding	655	68419.7
Q9D7Z6	Calcium-activated chloride channel regulator 1	23844,ENSMUSG00000028255	Clca1,Clca3	Clca1,Clca2,gob5,Clca3,gob-5	3	3 H2|3 69.26 cM	Mus musculus	0	S	PF00092,PF08434,PF09315,PF13519	extracellular,membrane	metabolic process,response to stimulus,transport	catalytic activity,metal ion binding,protein binding,transporter activity	913	100009
P50543	protein S100-A11	ENSMUSG00000027907,20195	S100a11	S100a14,S100c,EMAPI,Emap1,cal	3	3|3 E-F	Mus musculus	1		PF00036,PF01023,PF13499,PF13833	cytoplasm,nucleus	regulation of biological process	metal ion binding,protein binding	98	11075.5
Q9QUI0	Transforming protein RhoA	ENSMUSG00000007815,11848	Rhoa	Arha1,Arha,Arha2	9	9|9 F2	Mus musculus	0		PF00025,PF00071,PF08477	cytoplasm,cytoskeleton,cytosol,endosome,membrane,mitochondrion,nucleus	cell differentiation,cell division,cell organization and biogenesis,cellular component movement,metabolic process,regulation of biological process,response to stimulus	catalytic activity,nucleotide binding,protein binding	193	21768.1
P35330	Intercellular adhesion molecule 2	ENSMUSG00000001029,15896	Icam2	Ly-60,Icam-2,CD102	11	11 E1|11 69.09 cM	Mus musculus	1	S	PF03921	membrane	response to stimulus	protein binding	277	31370
Q00623	Apolipoprotein A-I	11806,ENSMUSG00000032083	Apoa1	apoA-I,Sep-1,Sep-2,Lvtw-1,Ltw-1,apo-AI,Apoa-1,Sep2,Alp-1,Brp-14	9	9 25.36 cM|9 A2-A4	Mus musculus	0	S	PF01442	cell surface,cytosol,extracellular,nucleus	cell organization and biogenesis,cell proliferation,cellular component movement,metabolic process,regulation of biological process,response to stimulus,transport	enzyme regulator activity,protein binding,transporter activity	264	30596.6
P08905	lysozyme c-2	17105,ENSMUSG00000069516	Lyz2	Lzp,Lzm,Lzm-s1,AI326280,Lyzs,Lys,Lysm	10	10 D2|10 65.34 cM	Mus musculus	0	S	PF00062,PF01464	cytoplasm,extracellular,organelle lumen	defense response,metabolic process,response to stimulus	catalytic activity,protein binding	148	16678.2
P17563	Selenium-binding protein 1	20341,ENSMUSG00000068874	Selenbp1	Lpsb,SBP56,Lp56	3	3 F2.1|3 40.74 cM	Mus musculus	0		PF05694,PF10282	cytoplasm,cytosol,membrane,nucleus	cell differentiation,transport	protein binding	472	52480.4
Q8BNA6	Protocadherin Fat 3	270120	Fat3	Gm1132,9430076A06Rik,MFAT3F,Gm510,D430038H04Rik	9	9|9 A2	Mus musculus	4	S	PF00008,PF00028,PF00054,PF02210	membrane	cell organization and biogenesis,cellular component movement,development,regulation of biological process	metal ion binding,protein binding	4555	501697
Q8VCT4	Carboxylesterase 1D	104158,ENSMUSG00000056973	Ces1d	TGH,Ces3	8	8|8 C5	Mus musculus	2	S	PF00135,PF00326,PF00756,PF07859,PF12695	cytoplasm,cytosol,endoplasmic reticulum,organelle lumen	cell differentiation,cell organization and biogenesis,metabolic process,response to stimulus	catalytic activity	565	61748.8
Q91VJ2	Protein kinase C delta-binding protein	109042,ENSMUSG00000037060	Prkcdbp	6330514M23Rik,3110015B12Rik,SRBC	7	7|7 F1	Mus musculus	0		PF15237	cytoplasm,membrane	cell organization and biogenesis,regulation of biological process	protein binding	260	27836.6
Q6NXH2	Glycoprotein endo-alpha-1,2-mannosidase	ENSMUSG00000040520,242362	Manea	4932703L02Rik	4	4|4 A3	Mus musculus	1		PF13274	Golgi,membrane	metabolic process	catalytic activity	462	53149.5
P10107	annexin A1	16952,ENSMUSG00000024659	Anxa1	Anx-A1,Lpc-1,Lpc1,C430014K04Rik,Anx-1	19	19 B|19 13.83 cM	Mus musculus	0		PF00191	cell surface,cytoplasm,cytoskeleton,endosome,membrane,nucleus,vacuole	cell differentiation,metabolic process,regulation of biological process,response to stimulus,transport	DNA binding,RNA binding,catalytic activity,enzyme regulator activity,metal ion binding,protein binding,structural molecule activity	346	38710
Q9DBX6	Cytochrome P450 2S1	74134,ENSMUSG00000040703	Cyp2s1	C79779,AU041727,1200011C15Rik	7	7|7 A3	Mus musculus	3	S	PF00067	cytoplasm,endoplasmic reticulum,membrane	metabolic process	catalytic activity,metal ion binding	501	55596.6
Q7TMF5	Serpin A12	68054,ENSMUSG00000041567	Serpina12	4632419J12Rik	12	12|12 F1	Mus musculus	1	S	PF00079	extracellular,membrane	regulation of biological process	enzyme regulator activity,protein binding	413	47603.4
P70207	Plexin-A2	18845,ENSMUSG00000026640	Plxna2	OCT,PlexA2,AW457381,2810428A13Rik,Plxn2,mKIAA0463,AA589422	1	1|1 H6	Mus musculus	4	S	PF01403,PF01437,PF01833,PF08337	membrane	cellular component movement,development,regulation of biological process,response to stimulus	protein binding,receptor activity,signal transducer activity	1894	211398
P05132	cAMP-dependent protein kinase catalytic subunit alpha	18747,ENSMUSG00000005469	Prkaca	Pkaca,PKA,Cs,PKCD	8	8|8 C3	Mus musculus	1		PF00069,PF07714,PF14531	Golgi,cytoplasm,cytosol,membrane,mitochondrion,nucleus	cellular homeostasis,metabolic process,regulation of biological process,response to stimulus	catalytic activity,nucleotide binding,protein binding	351	40545
Q64471	Glutathione S-transferase theta-1	ENSMUSG00000001663,14871	Gstt1	AI255817,Gstt1-1	10	10 38.58 cM|10 B5-C1	Mus musculus	1		PF00043,PF02798,PF13409,PF13410,PF13417,PF14497	cytoplasm,cytosol,nucleus	metabolic process,response to stimulus	antioxidant activity,catalytic activity,protein binding	240	27356.3
P02088	Hemoglobin subunit beta-1	15129	Hbb-b1	beta1,Hbbt1,AA409645,HBB1,Hbbt2,MommeD7	7	7 E3|7 54.85 cM	Mus musculus	1		PF00042		regulation of biological process,transport	antioxidant activity,catalytic activity,metal ion binding,protein binding,transporter activity	147	15830.1
P01887	Beta-2-microglobulin	12010,ENSMUSG00000060802	B2m	beta2m,Ly-m11,beta2-m	2	2 60.55 cM|2 F1-F3	Mus musculus	0	S	PF07654	Golgi,cytoplasm,extracellular,membrane	cell differentiation,defense response,metabolic process,regulation of biological process,response to stimulus	protein binding	119	13769.9
Q9EQP2	EH domain-containing protein 4	98878,ENSMUSG00000027293	Ehd4	Past2,AV006278,AI197390,2210022F10Rik,AI846352	2	2|2 E5	Mus musculus	0		PF00350,PF01926,PF12763	endoplasmic reticulum,endosome,membrane	cell organization and biogenesis,metabolic process,regulation of biological process,response to stimulus,transport	catalytic activity,metal ion binding,nucleotide binding,protein binding	541	61441.5
P56391	Cytochrome c oxidase subunit 6B1	ENSMUSG00000036751,110323	Cox6b1	2010000G05Rik,Cox6b	7	7 B1|7 18.84 cM	Mus musculus	0		PF02297	membrane,mitochondrion	metabolic process,transport	catalytic activity,transporter activity	86	10064.9
P26039	Talin-1	ENSMUSG00000028465,21894	Tln1	Tln	4	4|4 B1	Mus musculus	3		PF00373,PF01608,PF02174,PF08913,PF09141,PF09379	cell surface,cytoplasm,cytoskeleton,membrane	cell organization and biogenesis	protein binding,structural molecule activity	2541	269650
P55096	ATP-binding cassette sub-family D member 3	ENSMUSG00000028127,19299	Abcd3	AI313901,PMP68,Pxmp1,PMP70,AU018866,AW146054	3	3 52.94 cM|3 G-H1	Mus musculus	5		PF00005,PF06472	membrane,mitochondrion,organelle lumen	cell organization and biogenesis,metabolic process,transport	catalytic activity,nucleotide binding,protein binding,transporter activity	659	75426.4
Q8R2S8	CD177 antigen	ENSMUSG00000052212,68891	Cd177	1190003K14Rik,Pdp3	7	7|7 A3	Mus musculus	1	S	PF00021	membrane			817	87033.4
Q9JMC8	Band 4.1-like protein 4B	ENSMUSG00000028434,54357	Epb4.1l4b	AU021054,BB007528,Lulu2,Epb41l4b,Ehm2,6430543G08Rik,AA589614,D4Ertd346e	4	4 B3|4 31.66 cM	Mus musculus	0		PF00373,PF08736,PF09379,PF09380	cytoplasm,cytoskeleton	cell organization and biogenesis	protein binding	527	59526.1
Q8BIR2	Protein asteroid homolog 1	ENSMUSG00000032567,66595	Aste1	AV006403,1100001A21Rik	9	9|9 F1	Mus musculus	2		PF12813				672	76321.3
Q8BKC8	Phosphatidylinositol 4-kinase beta	ENSMUSG00000038861,107650	Pi4kb	PI4Kbeta,Pik4cb,AA437822,PI4K-beta,ESTM41	3	3|3 F2.1	Mus musculus	1		PF00454	Golgi,cytoplasm,cytosol,endoplasmic reticulum,membrane,mitochondrion	metabolic process,regulation of biological process,response to stimulus	catalytic activity,nucleotide binding	816	91457.6
Q8K2I3	Dimethylaniline monooxygenase [N-oxide-forming] 2	ENSMUSG00000040170,55990	Fmo2	2310008D08Rik,2310042I22Rik,AW107733	1	1|1 H1	Mus musculus	1		PF00743,PF07992,PF13434,PF13450,PF13454,PF13738	endoplasmic reticulum,membrane	metabolic process	catalytic activity,nucleotide binding	535	60935.5
Q8BLA1	Deleted in lung and esophageal cancer protein 1 homolog	320256	Dlec1	D630005C06Rik	9	9|9 F3	Mus musculus	2			cytoplasm			635	71137.6
Q9Z1G3	V-type proton ATPase subunit C 1	ENSMUSG00000022295,66335	Atp6v1c1	1700025B18Rik,U13839	15	15|15 C	Mus musculus	1		PF03223	cytoplasm,membrane	metabolic process,transport	catalytic activity,transporter activity	382	43860
P01029	Complement C4-B	12268,ENSMUSG00000073418	C4b	C4,Ss	17	17 B1|17 18.29 cM	Mus musculus	2	S	PF00207,PF01759,PF01821,PF01835,PF07677,PF07678,PF07703,PF10569,PF11974,PF13249	extracellular	defense response,metabolic process,regulation of biological process,response to stimulus	enzyme regulator activity,protein binding	1738	192793
Q80VP0	Tectonin beta-propeller repeat-containing protein 1	70381,ENSMUSG00000066621	Tecpr1	2210010N04Rik,mKIAA1358	5	5|5 G2	Mus musculus	0		PF00169,PF06398,PF06462	membrane,vacuole	cell organization and biogenesis,metabolic process	protein binding	1166	130184
Q91XV3	Brain acid soluble protein 1	ENSMUSG00000045763,70350	Basp1	NAP22,NAP-22,Ckap3,CAP23,2610024P12Rik,CAP-23	15	15|15 B1	Mus musculus	0			cytoplasm,membrane,nucleus	cell differentiation,regulation of biological process	DNA binding,protein binding	226	22073.6
P97461	40S ribosomal protein S5	20103	Rps5	AA617411	7	7|7 A1	Mus musculus	0		PF00177	membrane,ribosome	metabolic process,regulation of biological process	RNA binding,structural molecule activity	204	22875.1
Q9JL95	proteoglycan 3	ENSMUSG00000027072,53856	Prg3	MBP2,MBPH	2	2 D|2 49.45 cM	Mus musculus	0	S	PF00059	extracellular	metabolic process,regulation of biological process,response to stimulus		222	25188
O35594	Intraflagellar transport protein 81 homolog	ENSMUSG00000029469,12589	Ift81	Cdv1,AW060663,Cdv-1r,Cdv-1	5	5 F|5 62.44 cM	Mus musculus	0		PF04111		cell differentiation,cell organization and biogenesis,cellular component movement,development,transport	protein binding	676	79235.3
Q8BG05	Heterogeneous nuclear ribonucleoprotein A3	ENSMUSG00000059005,229279	Hnrnpa3	2610510D13Rik,2610209F03Rik,Hnrpa3,2410013L13Rik	2	2|2 A7.2	Mus musculus	0		PF00076,PF13893,PF14259	cytoplasm,nucleus,spliceosomal complex	metabolic process,transport	RNA binding,nucleotide binding,transporter activity	379	39627.6
Q8K021	Secretory carrier-associated membrane protein 1	ENSMUSG00000021687,107767	Scamp1	AI415563,AW122395,4930505M11Rik	13	13|13 D1	Mus musculus	4		PF04144	Golgi,endosome,membrane	transport	protein binding	338	38003.8
Q61029	Lamina-associated polypeptide 2, isoforms beta/delta/epsilon/gamma	21917,ENSMUSG00000019961	Tmpo	AW214352,5630400D24Rik,AI195756,AI606875,AW547477,TP,LAP2	10	10 C2|10 45.66 cM	Mus musculus	1		PF03020,PF08198	chromosome,membrane,nucleus	regulation of biological process	DNA binding,protein binding	452	50342.2
P24549	Retinal dehydrogenase 1	ENSMUSG00000053279,11668	Aldh1a1	Aldh1a2,Aldh1,E1,Ahd2,Ahd-2,Raldh1	19	19 B|19 13.91 cM	Mus musculus	1		PF00171,PF05893,PF07368	cytoplasm,nucleus	cell organization and biogenesis,metabolic process,regulation of biological process,response to stimulus	catalytic activity,protein binding	501	54432.9
A6BLY7	keratin, type I cytoskeletal 28	ENSMUSG00000055937,70843	Krt28	4733401L19Rik,Krt25d	11	11|11 D	Mus musculus	0		PF00038	cytoplasm		structural molecule activity	462	50315.1
P26645	Myristoylated alanine-rich C-kinase substrate	17118,ENSMUSG00000069662	Marcks	Macs,PKCSL	10	10 B1|10 19.49 cM	Mus musculus	0			cytoplasm,cytoskeleton,membrane,nucleus		protein binding	309	29643.8
P97371	Proteasome activator complex subunit 1	ENSMUSG00000022216,19186	Psme1	PA28a,AW413925	14	14 28.19 cM|14 C2-D1	Mus musculus	0		PF02251,PF02252	proteasome	regulation of biological process	enzyme regulator activity,protein binding	249	28655
Q8BI29	Specifically androgen-regulated gene protein	ENSMUSG00000042510,212439	AA986860	E030025M07,Sarg	1	1|1 E4	Mus musculus	0		PF15385	cytoplasm,membrane			606	65052.4
Q9D379	epoxide hydrolase 1	13849,ENSMUSG00000038776	Ephx1	Eph1,mEH,Epxh1,Eph-1,AI195553	1	1 H4|1 84.48 cM	Mus musculus	1		PF00561,PF06441,PF12697	endoplasmic reticulum,membrane	metabolic process,response to stimulus	catalytic activity,protein binding	455	52543
P63276	40S ribosomal protein S17	ENSMUSG00000061787,20068	Rps17		7	7|7 D3	Mus musculus	0		PF00833	membrane,ribosome	cell organization and biogenesis,metabolic process	RNA binding,structural molecule activity	135	15514.4
Q9CZ69	CKLF-like MARVEL transmembrane domain-containing protein 6	67213,ENSMUSG00000032434	Cmtm6	AA536733,2810051A14Rik,Cklfsf6	9	9|9 F3	Mus musculus	3	S		membrane	response to stimulus	protein binding	183	19811.3
Q99KX1	Myeloid leukemia factor 2	ENSMUSG00000030120,30853	Mlf2	C77284,AU018944,AI256856	6	6|6 F2	Mus musculus	1		PF10248	cytoplasm,membrane,nucleus	defense response,response to stimulus	protein binding	247	28037.2
P61028	Ras-related protein Rab-8B	235442,ENSMUSG00000036943	Rab8b	5930437D16,D330025I23Rik	9	9|9 C	Mus musculus	0		PF00025,PF00071,PF08477	cytoplasm,endosome,membrane,mitochondrion,nucleus	cell organization and biogenesis,regulation of biological process,response to stimulus,transport	catalytic activity,nucleotide binding,protein binding	207	23588.1
O54724	polymerase I and transcript release factor	19285,ENSMUSG00000004044	Ptrf	AW546441,Cav-p60,Cavin,2310075E07Rik	11	11 D|11 63.95 cM	Mus musculus	0		PF15237	cytoplasm,cytosol,endoplasmic reticulum,membrane,mitochondrion,nucleus	metabolic process,regulation of biological process	RNA binding	392	43927.1
Q9EPT5	Solute carrier organic anion transporter family member 2A1	ENSMUSG00000032548,24059	Slco2a1	2310021C19Rik,Slc21a2,mPgt,Pgt	9	9 F1|9 54.72 cM	Mus musculus	12		PF03137,PF07648,PF07690	membrane	transport	protein binding,transporter activity	643	70101.3
Q921I1	Serotransferrin	ENSMUSG00000032554,22041	Trf	hpx,Tfn,AI266983,HP,Tf,Cd176	9	9 55.03 cM|9 F1-F3	Mus musculus	1	S	PF00405,PF12974	cell surface,endosome,extracellular,membrane,mitochondrion	cell differentiation,cell organization and biogenesis,cellular homeostasis,metabolic process,regulation of biological process,response to stimulus,transport	metal ion binding,protein binding,transporter activity	697	76673.8
Q91VM5	RNA binding motif protein, X-linked-like-1	19656,ENSMUSG00000037070	Rbmxl1	Rbmxrt,Hnrpg,Rbmx	8	8|8 C1	Mus musculus	0		PF00076,PF08081,PF13893,PF14259	nucleus,spliceosomal complex	cell organization and biogenesis,metabolic process,regulation of biological process,response to stimulus	DNA binding,RNA binding,nucleotide binding,protein binding	388	42136.2
P26231	Catenin alpha-1	12385,ENSMUSG00000037815	Ctnna1	2010010M04Rik,Catna1,AI988031,AA517462	18	18 B1|18 18.89 cM	Mus musculus	1		PF01044	cytoplasm,cytoskeleton,cytosol,membrane	cell organization and biogenesis,regulation of biological process,response to stimulus	RNA binding,protein binding,structural molecule activity	906	100044
Q9D2Q8	protein S100-A14	66166,ENSMUSG00000042306	S100a14	S100a15,1110013O05Rik,S114	3	3|3 F2	Mus musculus	0		PF01023	cytoplasm,cytoskeleton,membrane	cell death,defense response,regulation of biological process,response to stimulus	metal ion binding,protein binding	104	11591.8
O88522	NF-kappa-B essential modulator	16151,ENSMUSG00000004221	Ikbkg	AI851264,NEMO,IKK[g],1110037D23Rik,AW124339,AI848108	X	X|X A7.3	Mus musculus	0		PF11577	cytoplasm,cytosol,nucleus	metabolic process,regulation of biological process,response to stimulus	catalytic activity,metal ion binding,protein binding	412	47942.2
Q9Z1N5	spliceosome RNA helicase DDX39B	53817,ENSMUSG00000019432	Ddx39b	Bat1a,AI428441,D6S81Eh,D17H6S81E-1,D17H6S81E,0610030D10Rik,Bat-1,Bat1	17	17 B1|17 18.6 cM	Mus musculus	0		PF00270,PF00271,PF14617	cytoplasm,membrane,nucleus,spliceosomal complex	cell organization and biogenesis,metabolic process,regulation of biological process,response to stimulus,transport	RNA binding,catalytic activity,nucleotide binding,protein binding	428	49004.1
Q8BPU7	Engulfment and cell motility protein 1	140580,ENSMUSG00000041112	Elmo1	CED-12,6330578D22Rik,C230095H21Rik	13	13|13 A3.1	Mus musculus	2		PF04727,PF11841	cytoplasm,cytoskeleton,membrane	cell death,cell organization and biogenesis,cellular component movement,regulation of biological process,response to stimulus,transport	protein binding	727	83881.7
P11031	Activated RNA polymerase II transcriptional coactivator p15	20024,ENSMUSG00000022205	Sub1	P9,P15,Rpo2tc1,Pc4,AI842364	15	15|15 A2	Mus musculus	0		PF02229	nucleus	metabolic process,regulation of biological process,response to stimulus	DNA binding,RNA binding	127	14418.4
Q924L1	LETM1 domain-containing protein 1	ENSMUSG00000037353,68614	Letmd1	MCC-32,AI593524,Mccr,HCCR1,1110019O13Rik,BB235638,BB130465,HCCR-2	15	15|15 F1	Mus musculus	1		PF07766	membrane,mitochondrion			360	41674.3
P28843	Dipeptidyl peptidase 4	ENSMUSG00000035000,13482	Dpp4	THAM,Cd26,Dpp-4	2	2 35.85 cM|2 C2-D	Mus musculus	0	S	PF00326,PF00930,PF01738,PF12695,PF12697	Golgi,cell surface,endoplasmic reticulum,extracellular,membrane	cellular component movement,defense response,metabolic process,regulation of biological process,response to stimulus	catalytic activity,protein binding,receptor activity	760	87381.2
Q8CI94	Glycogen phosphorylase, brain form	ENSMUSG00000033059,110078	Pygb		2	2 G3|2 74.74 cM	Mus musculus	1		PF00343	cytoplasm,membrane	metabolic process	catalytic activity,protein binding	843	96668.6
Q9WTP7	GTP:AMP phosphotransferase AK3, mitochondrial	56248,ENSMUSG00000024782	Ak3	Akl3l,Ak3l,AK-3,AA407498,Ak3l1,AI506714	19	19|19 C1	Mus musculus	0		PF00406,PF05191,PF13207,PF13238,PF13671	mitochondrion,organelle lumen	cell organization and biogenesis,metabolic process	catalytic activity,nucleotide binding,protein binding	227	25410.5
Q61107	Guanylate-binding protein 4	ENSMUSG00000028268,55932	Gbp3	GBP-4,Gbp4,GBP-3,AW228655	3	3|3 H1	Mus musculus	3		PF02263,PF02841,PF05879,PF10359	cytoplasm,cytosol,nucleus	defense response,metabolic process,response to stimulus	catalytic activity,nucleotide binding	620	70756.9
Q8BVP5	casein kinase I isoform gamma-2	103236,ENSMUSG00000003345	Csnk1g2	AI463719,2810429I12Rik	10	10|10 C1	Mus musculus	1		PF00069,PF07714,PF12605	cytoplasm,membrane,nucleus	metabolic process,regulation of biological process,response to stimulus,transport	catalytic activity,metal ion binding,nucleotide binding,protein binding	415	47552.3
Q61735	Leukocyte surface antigen CD47	16423	Cd47	AI848868,Itgp,AW108519,AA407862,9130415E20Rik,B430305P08Rik,IAP	16	16|16 B5	Mus musculus	5	S	PF04549,PF08204	membrane	cellular component movement,regulation of biological process,response to stimulus	protein binding,receptor activity,signal transducer activity	303	33075.8
Q9CQ80	Vacuolar protein-sorting-associated protein 25	ENSMUSG00000078656,28084	Vps25	D11Wsu68e,AW107467,1110020N13Rik	11	11 D|11 64.48 cM	Mus musculus	0		PF05871	cytoplasm,cytosol,endosome,membrane,mitochondrion,nucleus	metabolic process,regulation of biological process,transport	protein binding,structural molecule activity	176	20734.5
Q62351	Transferrin receptor protein 1	ENSMUSG00000022797,22042	Tfrc	E430033M20Rik,AI195355,p90,2610028K12Rik,Trfr,TFR1,AU015758,AI426448,CD71,TR,Mtvr1,TFR,Mtvr-1	16	16 B3|16 23.06 cM	Mus musculus	1		PF02225,PF04253,PF04389	cell surface,endosome,extracellular,membrane,mitochondrion	cell differentiation,cellular homeostasis,metabolic process,regulation of biological process,response to stimulus,transport	RNA binding,catalytic activity,protein binding,receptor activity,transporter activity	763	85677.4
Q9CR26	Vacuolar protein sorting-associated protein VTA1 homolog	ENSMUSG00000019868,66201	Vta1	1110001D18Rik,SBP1,AU040813,C85340,1110059P08Rik,LIP5	10	10|10 A2	Mus musculus	1		PF04652	cytoplasm,cytosol,endosome,membrane	cell organization and biogenesis,transport	protein binding	309	33891.9
P62814	V-type proton ATPase subunit B, brain isoform	11966,ENSMUSG00000006273	Atp6v1b2	Atp6b2,AI194269,R74844,AI790362,HO57	8	8|8 B3.3	Mus musculus	1		PF00006,PF00306,PF02874	Golgi,cytoplasm,cytosol,membrane	metabolic process,transport	catalytic activity,nucleotide binding,transporter activity	511	56514.9
Q8BXK9	Chloride intracellular channel protein 5	224796,ENSMUSG00000023959	Clic5	jbg,B330005L24,Gm322,5730531E12Rik	17	17|17 C	Mus musculus	1		PF13409,PF13410,PF13417	Golgi,cytoplasm,cytoskeleton,membrane	cell organization and biogenesis,regulation of biological process,response to stimulus,transport	protein binding,transporter activity	251	28269.4
O08688	calpain-5	ENSMUSG00000035547,12337	Capn5	nCL-3	7	7|7 E2	Mus musculus	0		PF00168,PF00648,PF01067	cell surface,cytoplasm	metabolic process	catalytic activity,protein binding	640	72908.7
O88491	Histone-lysine N-methyltransferase, H3 lysine-36 and H4 lysine-20 specific	18193	Nsd1	AI528500,KMT3B	13	13|13 B1	Mus musculus	0		PF00628,PF00855,PF00856	chromosome,nucleus	cell organization and biogenesis,development,metabolic process,regulation of biological process	DNA binding,catalytic activity,metal ion binding,protein binding	2588	283903
P63082	V-type proton ATPase 16 kDa proteolipid subunit	ENSMUSG00000024121,11984,100039636	Atp6v0c,Atp6v0c-ps2	Atpl-rs1,Atpl,Atp6l,Atp6c2,Vma3,VATL,Gm15487,Atp6l-ps2,PL16,Atp6c	17,6	17|17 A3.3,6 B1|6	Mus musculus	4		PF00137	Golgi,membrane,organelle lumen,vacuole	cellular homeostasis,metabolic process,regulation of biological process,transport	catalytic activity,protein binding,transporter activity	155	15797.5
P63030	Mitochondrial pyruvate carrier 1	ENSMUSG00000023861,55951	Mpc1	Brp44l,0610006G08Rik,3830411I18Rik	17	17 A1|17 4.92 cM	Mus musculus	1		PF01483,PF03650	membrane,mitochondrion	metabolic process,transport	catalytic activity,transporter activity	109	12446.3
P14234	Tyrosine-protein kinase Fgr	14191,ENSMUSG00000028874	Fgr		4	4 D2.3|4 66.11 cM	Mus musculus	1		PF00017,PF00018,PF00069,PF07653,PF07714,PF08239,PF14604	cytoplasm,cytoskeleton,cytosol,membrane,mitochondrion	cell differentiation,defense response,metabolic process,regulation of biological process,response to stimulus	catalytic activity,nucleotide binding,protein binding	517	58829.1
Q64314	Hematopoietic progenitor cell antigen CD34	12490,ENSMUSG00000016494	Cd34	AU040960	1	1 H6|1 98.38 cM	Mus musculus	1	S	PF06365	cell surface,cytoplasm,extracellular,membrane,vacuole	cell communication,cell differentiation,cell organization and biogenesis,cell proliferation,cellular component movement,metabolic process,regulation of biological process,response to stimulus	protein binding	382	40957.1
P97449	aminopeptidase N	ENSMUSG00000039062,16790	Anpep	Apn,Cd13,P150,AP-M,AP-N	7	7|7 D3	Mus musculus	0	S	PF01433,PF11838,PF13485	membrane,organelle lumen	cell differentiation,development,metabolic process,regulation of biological process	catalytic activity,metal ion binding	966	109582
Q9JME5	AP-3 complex subunit beta-2	11775,ENSMUSG00000062444	Ap3b2	[b]-NAP,beta3B,AU042881,AI549966,beta-NAP,Naptb	7	7 D3|7 45.71 cM	Mus musculus	1		PF01602,PF12717,PF13646,PF14796	Golgi,cytoplasm,membrane,nucleus	cellular component movement,transport		1082	119118
Q0P5W1	Vacuolar protein sorting-associated protein 8 homolog	209018,ENSMUSG00000033653	Vps8	AU040738,AI315068,mKIAA0804	16	16|16 B1	Mus musculus	3		PF12816,PF13639			metal ion binding,protein binding	1427	161042
Q61093	Cytochrome b-245 heavy chain	ENSMUSG00000015340,13058	Cybb	gp91-1,Cyd,CGD91-phox,C88302,Nox2,Cgd,gp91phox	X	X|X A1.1	Mus musculus	4	S	PF00970,PF01794,PF08022,PF08030	Golgi,cytoplasm,endoplasmic reticulum,membrane,mitochondrion	defense response,metabolic process,regulation of biological process,response to stimulus,transport	catalytic activity,metal ion binding,nucleotide binding,protein binding,transporter activity	570	65262.4
P18242	Cathepsin D	13033,ENSMUSG00000007891	Ctsd	CD,CatD	7	7|7 F5	Mus musculus	0	S	PF00026,PF07966,PF14541,PF14543	extracellular,membrane,mitochondrion,vacuole	cell organization and biogenesis,metabolic process	catalytic activity	410	44925
Q68FF6	ARF GTPase-activating protein GIT1	ENSMUSG00000011877,216963	Git1	p95Cat,Cat-1	11	11|11 B5	Mus musculus	0		PF00023,PF01412,PF08518,PF12205,PF12796,PF13637,PF13857	cytoplasm,membrane	metabolic process,regulation of biological process,response to stimulus	catalytic activity,enzyme regulator activity,metal ion binding,protein binding	770	85247.4
P19973	Lymphocyte-specific protein 1	ENSMUSG00000018819,16985	Lsp1	pp52,p50,WP34,Lsp-1	7	7 F5|7 87.93 cM	Mus musculus	0		PF02029	membrane	cell death,cell organization and biogenesis,defense response,regulation of biological process,response to stimulus	protein binding,signal transducer activity	330	36691.8
P14483	H-2 class II histocompatibility antigen, A beta chain	14961,ENSMUSG00000073421	H2-Ab1	AI845868,Rmcs1,Abeta,IAb,H-2Ab,I-Abeta,Ia2,Ia-2,H2-Ab	17	17 B1|17 17.98 cM	Mus musculus	1	S	PF00969,PF07654,PF08205	Golgi,cell surface,endosome,membrane	regulation of biological process,response to stimulus	protein binding	265	30109.2
Q8BI08	protein MAL2	ENSMUSG00000024479,105853	Mal2	AI461653	15	15|15 D1	Mus musculus	4		PF01284	membrane			175	19081.8
Q9JIF9	Myotilin	58916,ENSMUSG00000024471	Myot	Ttid,5530402I04Rik	18	18|18 B3	Mus musculus	0		PF00047,PF06832,PF07679,PF13895,PF13927	cytoplasm,cytoskeleton,membrane		protein binding,structural molecule activity	496	55282
Q9D6X6	Serine protease 23	ENSMUSG00000039405,76453	Prss23	4930479H08Rik,2310046G15Rik,AI790574,Spuve	7	7|7 E1	Mus musculus	0	S	PF00089	extracellular,nucleus	metabolic process	catalytic activity	382	43044
P21279	Guanine nucleotide-binding protein G(Q) subunit alpha	14682,ENSMUSG00000024639	Gnaq	Dsk1,6230401I02Rik,1110005L02Rik,GqI,Gq,Galphaq,AW060788,Dsk10,AA408290	19	19 A|19 11.01 cM	Mus musculus	1		PF00025,PF00503	cytosol,membrane,nucleus	metabolic process,regulation of biological process,response to stimulus	catalytic activity,enzyme regulator activity,metal ion binding,nucleotide binding,protein binding,signal transducer activity	359	42131.4
Q9R233	Tapasin	21356	Tapbp	D17Wsu91e,TPN	17	17 B1|17 17.98 cM	Mus musculus	1	S	PF07654	endoplasmic reticulum,membrane	cell organization and biogenesis,defense response,metabolic process,response to stimulus	protein binding	465	49705.2
P62827	GTP-binding nuclear protein RAN	100045999,19384,ENSMUSG00000029430,102641332	LOC102641332,LOC100045999,Ran		5,9	5|5 G1.3,9|9	Mus musculus	0		PF00025,PF00071,PF08477	chromosome,cytoplasm,endosome,membrane,nucleus	cell division,cell organization and biogenesis,metabolic process,regulation of biological process,response to stimulus,transport	RNA binding,catalytic activity,nucleotide binding,protein binding	216	24407.6
P62835	ras-related protein Rap-1A	ENSMUSG00000068798,109905	Rap1a	AI848598,Rap1,Krev-1,G-22K	3	3 F2.2|3 46.45 cM	Mus musculus	0		PF00009,PF00071,PF08477	cytoplasm,endosome,membrane	metabolic process,regulation of biological process,response to stimulus,transport	catalytic activity,nucleotide binding,protein binding,transporter activity	184	20973.7
P62806	histone H4	100862646,ENSMUSG00000060678,97122,ENSMUSG00000069305,ENSMUSG00000069274,100041230,ENSMUSG00000069266,320332,326619,ENSMUSG00000091405,ENSMUSG00000060093,319159,ENSMUSG00000096010,69386,319157,319158,ENSMUSG00000060639,326620,ENSMUSG00000069306,319160,ENSMUSG00000067455,319161,102641229,ENSMUSG00000061482,ENSMUSG00000060981,319155,ENSMUSG00000064288,319156	Hist1h4c,Hist1h4d,Hist1h4f,Hist1h4h,Hist2h4,Hist1h4i,Hist1h4j,LOC100862646,Hist1h4a,Hist1h4b,LOC102641229,Hist1h4k,Hist1h4n,Hist1h4m,Hist4h4	1700024H08Rik,Gm11275,B130044J01Rik,H4,OTTMUSG00000000446,X04652	13,3,6	13 A3.1|13,13|13 A2-A3,13|13 A3.1,3|3 F1-F2,6|6 G1	Mus musculus	0		PF00125,PF02969,PF15630	chromosome,cytoskeleton,membrane,nucleus	cell organization and biogenesis,metabolic process,regulation of biological process	DNA binding,RNA binding,protein binding	103	11360.4
P39654	arachidonate 15-lipoxygenase	ENSMUSG00000018924,11687	Alox15	12/15-LO,Alox12l,L-12LO,15-LOX,12-LO	11	11 B3|11 42.99 cM	Mus musculus	2		PF00305,PF01477	cytoplasm,cytosol,membrane,nucleus	cell organization and biogenesis,metabolic process,regulation of biological process,response to stimulus,transport	catalytic activity,metal ion binding,protein binding	663	75396.2
P27601	Guanine nucleotide-binding protein subunit alpha-13	14674,ENSMUSG00000020611	Gna13	Galpha13,AU043124,AU024132	11	11 E1|11 71.88 cM	Mus musculus	0		PF00025,PF00503	cytoplasm,cytosol,membrane,nucleus	cell differentiation,cellular homeostasis,metabolic process,regulation of biological process,response to stimulus	catalytic activity,metal ion binding,nucleotide binding,protein binding,signal transducer activity	377	44026.8
Q99NF2	NMDA receptor synaptonuclear signaling and neuronal migration factor	ENSMUSG00000006476,56876	Nsmf,Nelf	Jacob,Nelf	2	2|2 A3	Mus musculus	0			cytoplasm,cytoskeleton,membrane,nucleus	regulation of biological process,response to stimulus	protein binding	532	60255.5
P26043	radixin	ENSMUSG00000032050,19684	Rdx	AA516625	9	9|9 A5.3	Mus musculus	0		PF00373,PF00769,PF09379,PF09380	cytoplasm,cytoskeleton,membrane	cell organization and biogenesis,regulation of biological process	RNA binding,protein binding	583	68500.4
P60710	Actin, cytoplasmic 1	ENSMUSG00000029580,11461	Actb	Actx,E430023M04Rik,beta-actin	5	5 G2|5 81.8 cM	Mus musculus	0		PF00022	cytoplasm,cytoskeleton,cytosol,membrane	cell organization and biogenesis,response to stimulus	DNA binding,nucleotide binding,protein binding	375	41709.7
P14152	Malate dehydrogenase, cytoplasmic	17449,ENSMUSG00000020321	Mdh1	Mor2,Mor-2,B230377B03Rik,MDH-s,MDHA,D17921	11	11 A3.1|11 13.89 cM	Mus musculus	1		PF00056,PF02866	cytoplasm,cytosol,mitochondrion	metabolic process,regulation of biological process	catalytic activity,nucleotide binding	334	36488.1
Q9DCV7	Keratin, type II cytoskeletal 7	ENSMUSG00000023039,110310	Krt7	Krt2-7,D15Wsu77e,K7	15	15 F2|15 56.88 cM	Mus musculus	0		PF00038,PF01576,PF06160,PF07926,PF08317,PF11559,PF12128,PF12137,PF13166,PF13514	Golgi,cytoplasm,cytoskeleton,nucleus	cell organization and biogenesis,metabolic process,regulation of biological process,transport	catalytic activity,motor activity,protein binding,structural molecule activity	457	50678.1
P01843	Ig lambda-1 chain C region	433053	LOC433053		16	16|16	Mus musculus	0		PF07654,PF13927	membrane		protein binding	105	11567.5
Q569L8	centromere protein J	ENSMUSG00000064128,219103	Cenpj	LIP1,LAP,Sas4,4932437H03Rik,CPAP,Gm81	14	14|14 C3	Mus musculus	0		PF00529,PF01025,PF01496,PF03938,PF04012,PF04111,PF04156,PF05262,PF05557,PF05667,PF07202,PF07926,PF10153,PF10186,PF10211,PF12128,PF13514,PF14915	cytoplasm,cytoskeleton,extracellular,membrane	cell organization and biogenesis,metabolic process,regulation of biological process,transport	enzyme regulator activity,nucleotide binding,protein binding,transporter activity	1344	152984
P68040	Guanine nucleotide-binding protein subunit beta-2-like 1	14694,ENSMUSG00000020372	Gnb2l1	Rack1,GB-like,AL033335,Gnb2-rs1,p205	11	11|11 B1.2	Mus musculus	0		PF00400	cytoplasm,cytoskeleton,cytosol,membrane,mitochondrion,nucleus	cell death,cell differentiation,cellular homeostasis,development,metabolic process,regulation of biological process,response to stimulus	RNA binding,enzyme regulator activity,protein binding,receptor activity	317	35054.6
P43274	Histone H1.4	50709,ENSMUSG00000051627	Hist1h1e	H1s-4,H1-4,H1.4,H1f4,H1e,H1var2	13	13|13 A3.1	Mus musculus	0		PF00538	chromosome,nucleus	cell organization and biogenesis,regulation of biological process	DNA binding,RNA binding,protein binding	219	21964
Q64445	cytochrome c oxidase subunit 8A, mitochondrial	12868,ENSMUSG00000035885	Cox8a	COX8L	19	19|19 A	Mus musculus	0	S	PF02285	membrane,mitochondrion	metabolic process,regulation of biological process,transport	catalytic activity,transporter activity	69	7643.14
O35459	Delta(3,5)-Delta(2,4)-dienoyl-CoA isomerase, mitochondrial	51798,ENSMUSG00000053898	Ech1	AA617331	7	7|7 A3	Mus musculus	0		PF00378	membrane,mitochondrion	metabolic process	catalytic activity,protein binding	327	36095.2
Q9JIW9	Ras-related protein Ral-B	64143,ENSMUSG00000004451	Ralb	5730472O18Rik	1	1|1 E2	Mus musculus	0		PF00025,PF00071,PF08477	membrane,vacuole	cell communication,cell death,cell division,metabolic process,regulation of biological process,response to stimulus	catalytic activity,nucleotide binding,protein binding	206	23334.9
P49290	Eosinophil peroxidase	13861,ENSMUSG00000052234	Epx	EPO	11	11 C|11 52.25 cM	Mus musculus	1	S	PF03098		cellular component movement,defense response,metabolic process,regulation of biological process,response to stimulus	antioxidant activity,catalytic activity,metal ion binding	716	81328.7
A2ARA8	Integrin alpha-8	ENSMUSG00000026768,241226	Itga8	AI447669	2	2 A1|2 9.12 cM	Mus musculus	2	S	PF00357,PF01839,PF08441,PF13517	cell surface,endoplasmic reticulum,membrane	cell differentiation,cell organization and biogenesis,development,regulation of biological process,response to stimulus	metal ion binding	1062	117482
Q9ERG0	LIM domain and actin-binding protein 1	ENSMUSG00000023022,65970	Lima1	Eplin,D15Ertd366e,3526402A12Rik,1110021C24Rik	15	15 F1|15 56.13 cM	Mus musculus	0		PF00412	cytoplasm,cytoskeleton,membrane	cell organization and biogenesis,regulation of biological process	metal ion binding,protein binding	753	84008.1
P70426	GTP-binding protein Rit1	ENSMUSG00000028057,19769	Rit1	ROC1,Rit,RIBB	3	3|3 F1	Mus musculus	0		PF00025,PF00071,PF08477	membrane	metabolic process,regulation of biological process,response to stimulus,transport	catalytic activity,nucleotide binding,protein binding,transporter activity	219	25152.9
P62141	Serine/threonine-protein phosphatase PP1-beta catalytic subunit	ENSMUSG00000014956,19046	Ppp1cb	1200010B19	5	5|5 B1	Mus musculus	0		PF00149	cytoplasm,nucleus	cell division,metabolic process,regulation of biological process,response to stimulus	catalytic activity,metal ion binding,protein binding	327	37162.6
Q5XG73	Acyl-CoA-binding domain-containing protein 5	74159,ENSMUSG00000026781	Acbd5	1300014E15Rik	2	2|2 A3	Mus musculus	1	S	PF00887	membrane,nucleus	cell organization and biogenesis,metabolic process,transport		508	56578.2
Q9WTR2	Mitogen-activated protein kinase kinase kinase 6	53608	Map3k6	MEKK6,MAPKKK6,Ask2	4	4|4 D2.3	Mus musculus	1		PF00069,PF07714,PF13281	cytoplasm	metabolic process,regulation of biological process,response to stimulus	catalytic activity,metal ion binding,nucleotide binding,protein binding,signal transducer activity	1291	142964
A6H611	Mitochondrial intermediate peptidase	70478,ENSMUSG00000021993	Mipep	MIP,5730405E07Rik	14	14|14 D1	Mus musculus	1		PF01432	mitochondrion,organelle lumen	metabolic process	catalytic activity,metal ion binding	711	80799.6
Q02248	Catenin beta-1	ENSMUSG00000006932,12387	Ctnnb1	Bfc,Mesc,Catnb	9	9 F4|9 72.19 cM	Mus musculus	1		PF00514	cytoplasm,cytoskeleton,cytosol,membrane,nucleus	cell communication,cell death,cell differentiation,cell organization and biogenesis,cell proliferation,cellular component movement,metabolic process,regulation of biological process,response to stimulus,transport	DNA binding,protein binding,signal transducer activity,structural molecule activity	781	85416.3
P28798	Granulins	14824	Grn	Pgrn,epithelin	11	11 D|11 66.29 cM	Mus musculus	0	S	PF00396	cell surface,extracellular,mitochondrion	cell proliferation,regulation of biological process,response to stimulus,transport	RNA binding,protein binding	589	63413.1
Q640L3	Cell cycle progression protein 1	72278,ENSMUSG00000034563	Ccpg1	D9Ertd392e,AI426686,CPR8,1700030B06Rik,9430028F23Rik,1810073J13Rik,AI875170	9	9 D|9 40.08 cM	Mus musculus	1			membrane	regulation of biological process	protein binding	753	86072.5
P51437	Cathelin-related antimicrobial peptide	12796	Camp	CAP18,FALL39,Cnlp,MCLP,Cramp	9	9 F2|9 59.8 cM	Mus musculus	0	S	PF00666	cytoplasm,extracellular	defense response,regulation of biological process,response to stimulus		173	19569.2
Q5DTT1	Protein KIAA2022	ENSMUSG00000046449,245555	C77370	A230051P11,Xpn,C77386,Kiaa2022,mKIAA2022	X	X|X D	Mus musculus	0			nucleus	development,metabolic process,regulation of biological process,response to stimulus	catalytic activity,nucleotide binding	1515	166997
Q62000	Mimecan	ENSMUSG00000021390,18295	Ogn	mimican,3110079A16Rik,mimecan,OG,OIF,SLRR3A	13	13|13 A5	Mus musculus	0	S	PF12799,PF13855	extracellular	regulation of biological process	protein binding	298	33990.6
Q9DC16	Endoplasmic reticulum-Golgi intermediate compartment protein 1	67458,ENSMUSG00000001576	Ergic1	maa-136,1200007D18Rik	17	17|17 B1	Mus musculus	1	S	PF07970,PF13850	Golgi,endoplasmic reticulum,membrane	transport		290	32541.5
P11276	fibronectin	ENSMUSG00000026193,14268	Fn1	Fn,Fn-1,E330027I09	1	1 C1-C5|1 36.05 cM	Mus musculus	1	S	PF00039,PF00040,PF00041	extracellular,membrane	cell differentiation,cell organization and biogenesis,cellular component movement,defense response,metabolic process,regulation of biological process,response to stimulus	enzyme regulator activity,metal ion binding,protein binding	2477	272365
Q60737	Casein kinase II subunit alpha	12995,ENSMUSG00000074698,ENSMUSG00000101523	Csnk2a1	Csnk2a1-rs4	1,2	2|2 G3	Mus musculus	0		PF00069,PF01633,PF01636,PF07714	nucleus	cell death,metabolic process,regulation of biological process,response to stimulus	catalytic activity,enzyme regulator activity,nucleotide binding,protein binding	391	45104.9
Q8BMK4	Cytoskeleton-associated protein 4	ENSMUSG00000046841,216197	Ckap4	CLIMP-63,5630400A09Rik,P63	10	10|10 C1	Mus musculus	1		PF13166	cell surface,cytoplasm,cytoskeleton,endoplasmic reticulum,membrane	cell organization and biogenesis	RNA binding,catalytic activity,motor activity	575	63653.8
Q9D7X3	dual specificity protein phosphatase 3	72349,ENSMUSG00000003518	Dusp3	5031436O03Rik,T-DSP11,VHR,2210015O03Rik	11	11|11 D	Mus musculus	0		PF00102,PF00782	cytoplasm,cytosol,nucleus	metabolic process,regulation of biological process	catalytic activity,protein binding	185	20459.2
Q8BJS4	SUN domain-containing protein 2	ENSMUSG00000042524,223697	Sun2	B230369L08Rik,C030011B15,Unc84b	15	15|15 E1	Mus musculus	2		PF04912,PF07738,PF14199	chromosome,endosome,membrane,nucleus	cell organization and biogenesis,cellular component movement,regulation of biological process	protein binding	731	81555.6
Q61469	lipid phosphate phosphohydrolase 1	ENSMUSG00000021759,19012	Ppap2a	Hic53,mPAP,PAP-2a,PAP2a,Hpic53,PAP2-alpha,LPP-1,LPP1	13	13|13 D2.2	Mus musculus	5	S	PF01569	membrane	metabolic process,regulation of biological process,response to stimulus	catalytic activity	283	31871
P19324	Serpin H1	12406,ENSMUSG00000070436	Serpinh1	colligin,gp46,Serpinh2,Hsp47,BERF-1,J6,Cbp2,Cbp1	7	7|7 E2	Mus musculus	1	S	PF00079	cytoplasm,endoplasmic reticulum,membrane,organelle lumen	cell organization and biogenesis,metabolic process,regulation of biological process,response to stimulus	RNA binding,enzyme regulator activity,protein binding	417	46504.2
Q9JJN2	Zinc finger homeobox protein 4	80892	Zfhx4	A930021B15,C130041O22Rik,Zfh-4,Zfh4	3	3|3 A1	Mus musculus	1		PF00046,PF05920	nucleus	metabolic process,regulation of biological process	DNA binding,metal ion binding	3550	392076
Q810U5	Coiled-coil domain-containing protein 50	ENSMUSG00000038127,67501	Ccdc50	2610529H08Rik,C3orf6,5730448P06Rik,D16Bwg1543e,AW546090,AW048328	16	16 B2|16 18.98 cM	Mus musculus	0		PF15295	cytoplasm			305	35299.9
Q3U1F9	Phosphoprotein associated with glycosphingolipid-enriched microdomains 1	94212,ENSMUSG00000027508	Pag1	Cbp,Pag,F730007C19Rik	3	3|3 A1	Mus musculus	0	S	PF15347	membrane	regulation of biological process,response to stimulus	protein binding	429	46520.2
Q7TMS5	ATP-binding cassette sub-family G member 2	26357	Abcg2	Bcrp1,AI428558,ABCP,MXR1,ABC15,MXR,BCRP	6	6 B3|6 27.82 cM	Mus musculus	4		PF00005,PF01061,PF12698,PF13304,PF13476	membrane,mitochondrion,nucleus	metabolic process,response to stimulus,transport	catalytic activity,nucleotide binding,protein binding,transporter activity	657	72930.9
Q62470	Integrin alpha-3	ENSMUSG00000001507,16400	Itga3	AA407068,CD49C,GAPB3	11	11 D|11 59.01 cM	Mus musculus	2	S	PF01839,PF08441,PF13517	cell surface,membrane	cell organization and biogenesis,cellular component movement,regulation of biological process,response to stimulus	protein binding	1053	116671
O35227	Disintegrin and metalloproteinase domain-containing protein 7	ENSMUSG00000022056,11500	Adam7	9230104J12Rik,EAPI,EAP1	14	14|14 D2	Mus musculus	1		PF00200,PF01421,PF01562,PF08516,PF13574,PF13582,PF13583,PF13688	membrane	metabolic process,regulation of biological process,response to stimulus	catalytic activity,metal ion binding	789	89129.4
Q08481	Platelet endothelial cell adhesion molecule	ENSMUSG00000020717,18613	Pecam1	Cd31,C85791,Pecam,PECAM-1	11	11|11 E1	Mus musculus	1	S	PF00047,PF07679,PF13895,PF13927	cell surface,membrane	cell organization and biogenesis,cellular component movement,regulation of biological process,response to stimulus,transport	protein binding	727	81211.1
Q6P8Y7	Sorting nexin-31	ENSMUSG00000013611,66696	Snx31	4631426E05Rik	15	15|15 C	Mus musculus	1		PF00787,PF00788		cell communication,transport	protein binding	439	50828.5
P08553	Neurofilament medium polypeptide	18040	Nefm	NF160,NF-M,Nef3,NF165,Nfm	14	14|14 D1	Mus musculus	0		PF00038,PF07888,PF10186,PF10498,PF12128,PF13166	cytoplasm,cytoskeleton	cell organization and biogenesis,cellular component movement,regulation of biological process,transport	protein binding,structural molecule activity	848	95858.4
P14824	annexin A6	11749,ENSMUSG00000018340	Anxa6	AnxVI,Camb,Cabm,Anx6,AW107198	11	11 B1.3|11 32.13 cM	Mus musculus	0		PF00191	cytoplasm,membrane	cell organization and biogenesis,regulation of biological process,transport	metal ion binding,nucleotide binding,protein binding,transporter activity	673	75837.5
Q99K41	EMILIN-1	ENSMUSG00000029163,100952	Emilin1	gp115,EMILIN-1,AW229038,BB105748,5830419M17Rik	5	5|5 B1	Mus musculus	1	S	PF00386,PF07546	extracellular	cell organization and biogenesis,regulation of biological process	protein binding,structural molecule activity	1017	107518
Q9CWT6	Probable ATP-dependent RNA helicase DDX28	71986,ENSMUSG00000045538	Ddx28	2410004K13Rik,Mddx28,AI449652	8	8|8 D3	Mus musculus	0		PF00270,PF00271,PF04851	cytoplasm,mitochondrion,nucleus	metabolic process	RNA binding,catalytic activity,nucleotide binding	540	59478.3
P99026	Proteasome subunit beta type-4	19172,ENSMUSG00000005779	Psmb4	Pros-27	3	3 40.74 cM|3 F2	Mus musculus	1		PF00227	cytoplasm,cytosol,nucleus,proteasome	metabolic process,regulation of biological process	catalytic activity	264	29097.3
Q9D1G5	Leucine-rich repeat-containing protein 57	66606	Lrrc57	AA407405,2810002D13Rik	2	2|2 E5	Mus musculus	0		PF12799,PF13855			protein binding	239	26743.3
A2AGL3	Ryanodine receptor 3	ENSMUSG00000057378,20192	Ryr3	RYR-3,C230090H21,AI851294	2	2|2 E5-F3	Mus musculus	15		PF00622,PF01365,PF02026,PF02815,PF06459,PF08454,PF08709,PF13833	cytosol,endoplasmic reticulum,membrane	cell organization and biogenesis,cellular homeostasis,response to stimulus,transport	metal ion binding,protein binding,transporter activity	4863	550974
P50516	V-type proton ATPase catalytic subunit A	ENSMUSG00000052459,11964	Atp6v1a	Atp6a2,Atp6a1,AI647066,VPP2,Atp6v1a1,VA68	16	16|16 B4	Mus musculus	0		PF00006,PF00306,PF02874	cytosol,membrane,mitochondrion	metabolic process,transport	catalytic activity,nucleotide binding,transporter activity	617	68282.6
Q9Z2V6	histone deacetylase 5	15184	Hdac5	Hdac4,mKIAA0600,mHDA1,AI426555	11	11|11 D	Mus musculus	1		PF00850,PF12203	Golgi,cytoplasm,cytosol,nucleus	cell differentiation,cell organization and biogenesis,defense response,metabolic process,regulation of biological process,response to stimulus	DNA binding,catalytic activity,metal ion binding,protein binding	1113	120867
O55040	Neuromedin-U receptor 1	14767	Nmur1	NMU-R1,Gpr66,NmU-R,NMU1R,FM-3	1	1|1 D	Mus musculus	6	S	PF00001	membrane	cell communication,regulation of biological process,response to stimulus,transport	receptor activity,signal transducer activity	405	45579.7
Q6R891	Neurabin-2	ENSMUSG00000038976,217124	Ppp1r9b	SPL,Spn	11	11|11 D	Mus musculus	0		PF00595,PF01496,PF04111,PF04156,PF05557,PF07106,PF07888	cytoplasm,cytoskeleton,membrane,nucleus	cell differentiation,cell organization and biogenesis,cellular component movement,development,metabolic process,regulation of biological process,response to stimulus	catalytic activity,enzyme regulator activity,protein binding	817	89465.7
P0C8K7	small integral membrane protein 1	68859,ENSMUSG00000078350	Smim1,1190007F08Rik	1190007F08Rik,0610011H04Rik,2700009I11Rik	4	4|4 E2	Mus musculus	1			membrane			78	8758.28
P33267	Cytochrome P450 2F2	ENSMUSG00000052974,13107	Cyp2f2	Cyp2f	7	7|7 A3	Mus musculus	2	S	PF00067	cytoplasm,endoplasmic reticulum,membrane	metabolic process,response to stimulus	catalytic activity,metal ion binding	491	55913.1
Q8BLB7	Lethal(3)malignant brain tumor-like protein 3	237339,ENSMUSG00000039089	L3mbtl3	MBT-1,AI481284	10	10|10 A4	Mus musculus	1		PF00536,PF02820,PF07647	nucleus	cell differentiation,cell organization and biogenesis,metabolic process,regulation of biological process	protein binding	883	99074.5
P97429	annexin A4	ENSMUSG00000029994,11746	Anxa4	Xanx-4,Anx4,AW106930,AIV,AI265406	6	6 D1|6 37.75 cM	Mus musculus	0		PF00191,PF05796	cell surface,cytoplasm,membrane,nucleus	regulation of biological process,response to stimulus	metal ion binding,protein binding	319	35893.1
Q99MR1	PERQ amino acid-rich with GYF domain-containing protein 1	ENSMUSG00000029714,57330	Gigyf1	mKIAA4110,Perq1	5	5|5 G2	Mus musculus	0		PF02213		regulation of biological process,response to stimulus	protein binding	1044	116167
O35074	prostacyclin synthase	ENSMUSG00000017969,19223	Ptgis	Cyp8,Cyp8a1,Pgis	2	2|2 H3	Mus musculus	2	S	PF00067	cytoplasm,endoplasmic reticulum,membrane,nucleus	metabolic process,regulation of biological process,response to stimulus	catalytic activity,metal ion binding	501	57010.7
P39447	Tight junction protein ZO-1	ENSMUSG00000030516,21872	Tjp1	ZO1	7	7 C|7 35.02 cM	Mus musculus	0		PF00018,PF00595,PF00625,PF00791,PF07653,PF13180	cell surface,cytoplasm,membrane,nucleus	cellular homeostasis,response to stimulus	protein binding	1745	194621
P41216	Long-chain-fatty-acid--CoA ligase 1	ENSMUSG00000018796,14081	Acsl1	Acas1,Acas,Acs,LACS1,FACS,LACS 1,Facl2	8	8|8 B2	Mus musculus	4		PF00501	endoplasmic reticulum,membrane,mitochondrion	metabolic process,regulation of biological process,response to stimulus,transport	catalytic activity,nucleotide binding	699	77901.5
P51912	Neutral amino acid transporter B(0)	20514	Slc1a5	AAAT,ATBO,M7V1,RDRC,ASCT2,R16,M7VS1,Slc1a7	7	7|7 A2	Mus musculus	8	S	PF00375	Golgi,extracellular,membrane	transport	transporter activity	553	58445.3
P56395	Cytochrome b5	109672,ENSMUSG00000024646	Cyb5a,Cyb5	Cyb5a,0610009N12Rik,Cyb5	18	18 E4|18 57.53 cM	Mus musculus	0		PF00173	endoplasmic reticulum,membrane,mitochondrion	metabolic process,response to stimulus,transport	catalytic activity,metal ion binding,protein binding	134	15231.5
Q9QZQ1	Afadin	ENSMUSG00000068036,17356	Mllt4	Afadin,Gm314,I-afadin,5033403D15Rik,Af-6,AF6,S-afadin	17	17|17 A2	Mus musculus	2		PF00498,PF00595,PF00788,PF01843	cytoplasm,membrane,nucleus	regulation of biological process,response to stimulus	protein binding	1820	206370
P81122	Insulin receptor substrate 2	ENSMUSG00000038894,384783	Irs2	Irs-2	8	8 A1.1|8 5.35 cM	Mus musculus	0		PF00169,PF02174,PF15413	cytoplasm,cytosol,membrane	cell proliferation,cellular homeostasis,regulation of biological process,response to stimulus	protein binding,signal transducer activity	1321	136678
Q9D5V5	Cullin-5	75717	Cul5	4921514I20Rik,VACM1,C030032G03Rik,8430423K24Rik,C330021I08Rik,AI852817,VACM-1	9	9|9 C	Mus musculus	0		PF00888,PF10557	cytoplasm,cytosol,membrane,nucleus	cellular component movement,cellular homeostasis,metabolic process,response to stimulus	catalytic activity,protein binding	780	90916.4
Q9QWV4	Myeloid leukemia factor 1	17349,ENSMUSG00000048416	Mlf1	HLS7	3	3 E1|3 30.91 cM	Mus musculus	0		PF10248	cytoplasm,nucleus	cell differentiation,development,metabolic process,regulation of biological process	DNA binding,protein binding	267	30412.8
Q9D7P7	Chloride intracellular channel protein 3	ENSMUSG00000015093,69454	Clic3	2300003G24Rik	2	2|2 A3	Mus musculus	1		PF13409,PF13410,PF13417	cytoplasm,membrane,nucleus	regulation of biological process,transport	protein binding,transporter activity	237	26828.8
Q5H8C4	Vacuolar protein sorting-associated protein 13a	271564,ENSMUSG00000046230	Vps13a	4930516E05Rik,Chorein,9930023P20,mKIAA0986,4930543C13Rik,4930425F11,Chac,D330038K10Rik	19	19|19 B	Mus musculus	11		PF06650,PF12624		response to stimulus,transport		3166	359171
Q63918	Serum deprivation-response protein	20324,ENSMUSG00000045954	Sdpr		1	1|1 C1.1	Mus musculus	0		PF15237	Golgi,cytoplasm,cytosol,membrane	regulation of biological process	protein binding	418	46735.4
P97384	annexin A11	11744,ENSMUSG00000021866	Anxa11	Anx11,A830099O17Rik	14	14 A3|14 15.06 cM	Mus musculus	0		PF00191	cytoplasm,cytoskeleton,membrane,nucleus,vacuole	cell division,response to stimulus,transport	RNA binding,metal ion binding,protein binding	503	54044.9
O08709	Peroxiredoxin-6	11758	Prdx6	Brp-12,Prdx6-rs3,Aop2,Ltw-4,mKIAA0106,1-Cys Prx,1-cysPrx,AA690119,9430088D19Rik,CC26,ORF06,Lvtw-4,NSGPx,CP-3,aiPLA2,NSGP,Ltw4,Prdx5,GPx,Aop2-rs3	1	1 H2.1|1 69.75 cM	Mus musculus	0		PF00578,PF08534,PF10417	cytoplasm,cytosol,membrane,mitochondrion,vacuole	cell organization and biogenesis,metabolic process,response to stimulus	antioxidant activity,catalytic activity,protein binding	224	24855
Q9Z329	Inositol 1,4,5-trisphosphate receptor type 2	ENSMUSG00000030287,16439	Itpr2	InsP3R-5,Itpr5,Ip3r2,AI649341,insP3R2,InsP3R-2	6	6 G3|6 77.7 cM	Mus musculus	11		PF01365,PF02815,PF08454,PF08709,PF12670	cytoplasm,endoplasmic reticulum,membrane	regulation of biological process,response to stimulus,transport	metal ion binding,receptor activity,signal transducer activity,transporter activity	2701	307277
Q3V3R4	Integrin alpha-1	109700,ENSMUSG00000042284	Itga1	E130012M19Rik,Vla1,CD49A	13	13 D2.2|13 64.61 cM	Mus musculus	2	S	PF00092,PF01839,PF08441,PF13517,PF13519,PF14312	cell surface,membrane	cell organization and biogenesis,cellular component movement,regulation of biological process,response to stimulus	metal ion binding,protein binding	1179	130727
O35639	annexin A3	ENSMUSG00000029484,11745	Anxa3	Anx3	5	5 E3|5 47.29 cM	Mus musculus	1		PF00191	cytoplasm,membrane	defense response,regulation of biological process,response to stimulus,transport	enzyme regulator activity,metal ion binding,protein binding	323	36361.6
P01899	H-2 class I histocompatibility antigen, D-B alpha chain	ENSMUSG00000073411,14964	H2-D1	H-2D,H2-D	17	17 B1|17 18.61 cM	Mus musculus	1	S	PF00129,PF06623,PF07654,PF08205	Golgi,cell surface,endoplasmic reticulum,membrane	regulation of biological process,response to stimulus	RNA binding,protein binding	362	40810.3
Q80Y61	Brain-specific angiogenesis inhibitor 1-associated protein 2-like protein 2	ENSMUSG00000018126,207495	Baiap2l2	BC048937	15	15|15 E1	Mus musculus	0		PF07653,PF08397,PF14604	cytoskeleton,cytosol,membrane	cell organization and biogenesis,regulation of biological process,response to stimulus	protein binding	522	58365.4
Q9JKF1	Ras GTPase-activating-like protein IQGAP1	29875,ENSMUSG00000030536	Iqgap1	D7Ertd237e,D7Ertd257e,AA682088,mKIAA0051	7	7 D3|7 45.68 cM	Mus musculus	1		PF00307,PF00616,PF03836,PF11016	cytoplasm,cytoskeleton,membrane,nucleus	cell growth,regulation of biological process,response to stimulus	enzyme regulator activity,protein binding	1657	188623
Q921C5	Protein bicaudal D homolog 2	76895,ENSMUSG00000037933	Bicd2	0610027D24Rik,mKIAA0699,AA408834,1110005D12Rik	13	13|13 A5	Mus musculus	0		PF03961,PF04111,PF04156,PF05483,PF06785,PF09730	Golgi,cytoplasm,cytoskeleton,membrane	cell organization and biogenesis,cellular component movement,metabolic process,transport	protein binding,transporter activity	820	93333.9
Q99JY8	lipid phosphate phosphohydrolase 3	67916,ENSMUSG00000028517	Ppap2b	2610002D05Rik,D4Bwg0538e,AV025606,D4Bwg1535e,1110003O22Rik,Ppab2b,Lpp3	4	4 C6|4 49.18 cM	Mus musculus	5	S	PF01569	endoplasmic reticulum,membrane	cell differentiation,development,metabolic process,regulation of biological process,response to stimulus	catalytic activity,protein binding	312	35193.1
Q9Z1G4	V-type proton ATPase 116 kDa subunit a isoform 1	ENSMUSG00000019302,11975	Atp6v0a1	Atp6n1,Atp6n1a,Atpv0a1,Vpp-1,AA959968,ATP6a1,Vpp1	11	11 D|11 64.04 cM	Mus musculus	7		PF01496	Golgi,cytoplasm,membrane,nucleus	cell organization and biogenesis,cellular homeostasis,metabolic process,transport	catalytic activity,protein binding,transporter activity	839	96404.5
